1  
2  
3  
4  
5  
6  
7  
8  
9  
10  
11  
12  
13  
14  
15  
16  
17  
18  
19  
20  
21  
22  
23  
24  
25  
26  
27  
28  
29  
30  
31  
32  
33  
34  
35  
36  
37  
38  
39  
40  
41  
42  
43  
44  
45  
46  
47  
48

**Title:** “TRIF is a key inflammatory mediator of acute sickness behavior and cancer cachexia”

Kevin G. Burfeind<sup>1,2</sup>, Xinxia Zhu<sup>1</sup>, Peter R. Levasseur<sup>1</sup>, Katherine A. Michaelis<sup>1,2</sup>, Mason A. Norgard<sup>1</sup>, Daniel L. Marks<sup>1,3,\*</sup>

<sup>1</sup>Papé Family Pediatric Research Institute, Oregon Health & Science University, Portland, OR USA

<sup>2</sup>Medical Scientist Training Program, Oregon Health & Science University, Portland, OR USA

<sup>3</sup>Knight Cancer Institute, Oregon Health & Science University, Portland, OR USA

*\*Corresponding Author Information*

Daniel L. Marks

3181 SW Sam Jackson Park Road

L 481

Portland, OR 97239

Email: [marksd@ohsu.edu](mailto:marksd@ohsu.edu)

49 **Abstract**

50 Hypothalamic inflammation is a key component of acute sickness behavior and  
51 cachexia, yet mechanisms of inflammatory signaling in the central nervous system  
52 remain unclear. We assessed the role of TRIF signaling in acute inflammation  
53 (lipopolysaccharide (LPS) challenge) and in a chronic inflammatory state (cancer  
54 cachexia). TRIFKO mice resisted anorexia and weight loss after peripheral  
55 (intraperitoneal, IP) or central (intracerebroventricular, ICV) LPS challenge and in a  
56 model of pancreatic cancer cachexia. Compared to WT mice, TRIFKO mice showed  
57 attenuated upregulation of *Il6*, *Ccl2*, *Ccl5*, *Cxcl1*, *Cxcl2*, and *Cxcl10* in the hypothalamus  
58 after IP LPS treatment, as well as attenuated microglial activation and neutrophil  
59 infiltration into the brain after ICV LPS treatment. Our results show that TRIF is an  
60 important inflammatory signaling mediator of sickness behavior and cachexia and  
61 presents a novel therapeutic target for these conditions.

62  
63  
64  
65  
66  
67  
68  
69  
70  
71  
72  
73  
74  
75  
76  
77  
78  
79  
80  
81

## 82 **Introduction**

83

84 Innate immune activation in response to various pathogens leads to systemic  
85 inflammation, inducing a distinct metabolic and behavioral paradigm that includes fever,  
86 weight loss, anorexia, and fatigue. This constellation of signs and symptoms, referred to  
87 as “sickness behavior” (Dantzer et al., 1998), is critical for combating infection and  
88 allows resources to be diverted to the immune system to fight pathogens. However, if  
89 sickness behavior is maintained in conditions of chronic inflammation, it can become  
90 maladaptive and manifest as cachexia. Cachexia is a devastating syndrome  
91 characterized by anorexia, increased catabolism of lean body mass, and lethargy  
92 (Argiles et al., 2010; Evans et al., 2008; Fearon et al., 2011). It is prevalent in numerous  
93 chronic diseases, including cancer (Tisdale, 2002), chronic renal failure (A. Y. Wang et  
94 al., 2004), congestive heart failure (Anker et al., 1997), and untreated HIV (Kotler,  
95 Tierney, Wang, & Pierson, 1989). Furthermore, cachexia is associated with increased  
96 mortality of the underlying disease and decreased quality of life (Bachmann et al., 2008;  
97 Lainscak, Podbregar, & Anker, 2007; Wesseltoft-Rao et al., 2015). Despite this serious  
98 clinical concern, there are currently no effective treatments and mechanisms remain  
99 controversial.

100 Our lab, along with others, described a central nervous system (CNS)-based  
101 mechanism of cachexia in which cytokines generated in the periphery are amplified and  
102 modified within the hypothalamus, leading to aberrant activity of weight- and activity-  
103 modulating neurons (Bluthé, Michaud, Poli, & Dantzer, 2000; Braun et al., 2011;  
104 Burfeind, Michaelis, & Marks, 2015; Grossberg et al., 2011). Specifically,  
105 intracerebroventricular (ICV) injection of inflammatory cytokines (Bodnar et al., 1989;

106 Sonti, Ilyin, & Plata-Salaman, 1996) or pathogen associated molecular patterns such as  
107 lipopolysaccharide (LPS) (Wisse et al., 2007) potently reduces food intake and activity.  
108 Furthermore, peripheral or central cytokine injection or immune challenge leads to rapid  
109 activation of neurons in areas that are critical for food intake and energy metabolism,  
110 such as the nuclei of the mediobasal hypothalamus (MBH) (Elmquist, Scammell,  
111 Jacobsen, & Saper, 1996; Konsman, Tridon, & Dantzer, 2000; Laflamme & Rivest,  
112 1999; Morgan & Curran, 1986). However, the cellular and molecular pathways whereby  
113 peripheral inflammation is translated in the brain into behavioral or metabolic responses  
114 remain undefined.

115 Toll-like receptors (TLRs) are key components of the innate immune system,  
116 recognizing a variety of pathogens and inflammatory signals. TLR function is  
117 important for mounting an appropriate inflammatory response, and metabolic  
118 signaling in the CNS is closely tied to TLR signaling (Jin et al., 2016b). Pro-  
119 inflammatory signaling via the Myeloid Differentiation Primary Response Gene 88  
120 (MyD88) pathway was initially thought to be the dominant mechanism whereby the  
121 binding of pathogenic signaling molecules to receptors is linked to the synthesis and  
122 release of inflammatory cytokines and chemokines (Medzhitov et al., 1998). However,  
123 recent data suggest that MyD88-independent pathways linking TLRs to cellular  
124 activation are present within the brain (Hanke & Kielian, 2011; Sen Lin et al., 2012). The  
125 adaptor protein TIR-domain-containing adaptor inducing interferon- $\beta$  (TRIF) is an  
126 important inflammatory signaling mediator, yet has received little attention in the context  
127 of CNS-mediated alterations in behavior and metabolism during illness. TRIF is the  
128 dominant adapter for TLR3 signaling, and plays an essential role in TLR4 responses to

129 LPS as well (Yamamoto et al., 2003). Furthermore, TRIF knockout (TRIFKO) mice are  
130 nearly as resistant to endotoxin-induced mortality as are MyD88KO mice (Feng et al.,  
131 2011).

132 The role of TRIF signaling in the CNS during acute sickness behavior and cachexia  
133 is unknown. We found that TRIF signaling is important for neuroinflammation and  
134 resulting acute sickness behavior after systemic or central exposure to LPS. We also  
135 found that mice lacking TRIF have attenuated cancer cachexia. These results implicate  
136 TRIF as a key signaling mediator in inflammation-driven behavioral and metabolic  
137 changes during illness, and a potential therapeutic target for cachexia.

138  
139  
140  
141  
142  
143  
144  
145  
146  
147  
148  
149  
150  
151  
152  
153  
154  
155  
156  
157  
158  
159  
160  
161  
162  
163  
164  
165

## 166 **Results**

### 167 **Mice lacking TRIF show attenuated acute illness response after systemic LPS** 168 **challenge**

170 TRIF is an important adaptor protein for innate immune activation (Yamamoto et al.,  
171 2003). While several studies demonstrate that MyD88 is important for acute sickness  
172 behavior, the role of TRIF in sickness behavior after LPS challenge is unknown. After  
173 systemic LPS challenge (250  $\mu$ g/kg, IP), TRIFKO mice showed attenuated anorexia and  
174 weight loss compared to WT mice (Fig. 1a and b). Next, in order to determine the  
175 degree of hypothalamic activation and quantify stress response, we measured plasma  
176 corticosterone (Gong et al., 2015). While WT mice showed a large increase in plasma  
177 corticosterone 4 hrs after IP LPS administration, LPS-treated TRIFKO mice did not  
178 show a significant increase (Fig. 1c).

179 CNS inflammation is a hallmark of acute illness responses and cachexia.  
180 Therefore, we measured expression of inflammatory cytokine and chemokine genes in  
181 the hypothalamus after systemic LPS challenge using qRT-PCR. We found that 8 hrs  
182 after 250  $\mu$ g/kg IP LPS, TRIFKO animals showed attenuated up-regulation of several  
183 cytokines and chemokines in the hypothalamus, including *Il6*, *Ccl2*, *Ccl5*, *Cxcl1*, *Cxcl2*,  
184 and *Cxcl10* (Fig. 1d). Alternatively, *Il1 $\beta$* , *Tnf*, *Ifn $\beta$* , and *Cd80* were either similarly  
185 upregulated compared to WT LPS-treated mice or not upregulated in either group of  
186 LPS-treated mice. It is important to note that basal expression of all  
187 cytokines/chemokines was detectable in hypothalami of saline-treated animals.

188 In order to rule out altered MyD88 signaling as a result of TRIF deletion, we  
189 challenged TRIFKO mice with 10 ng ICV IL-1 $\beta$ . MyD88 is essential for IL-1R signaling,

190 but TRIF is not involved (Muzio, Ni, Feng, & Dixit, 1997). We found that WT and  
 191 TRIFKO mice had similar anorexia response to ICV IL-1 $\beta$  (Fig. 1 – figure supplement  
 192 1a). While WT IL-1 $\beta$ -treated mice lost more weight than WT saline-treated mice, it was  
 193 not significantly more than TRIFKO IL-1 $\beta$ -treated mice (Fig. 1 – figure supplement 1b).  
 194 Lastly, *Myd88* was equally expressed in WT and TRIFKO mice at baseline, and similarly  
 195 upregulated after IP LPS exposure (Fig. 1 – figure supplement 1b).

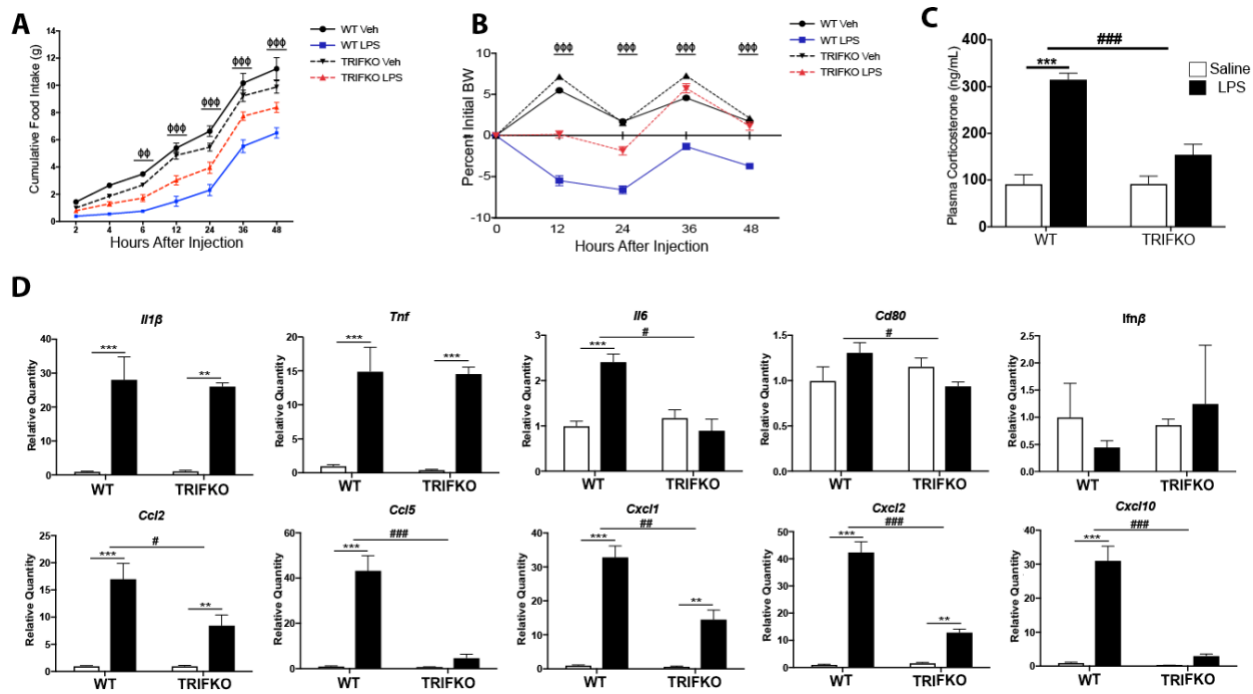

196  
 197 **Figure 1: TRIFKO mice have attenuated acute sickness behavior in response to**  
 198 **systemic LPS exposure.** A) Cumulative food intake after 250  $\mu$ g/kg IP LPS treatment.  
 199 Veh = vehicle treatment (BSA/saline).  $\Phi$  =  $p < .05$ ,  $\Phi\Phi$  =  $p < .01$ ,  $\Phi\Phi\Phi$  =  $p < .001$  for WT  
 200 LPS vs. TRIFKO LPS in Bonferroni post-hoc comparisons. B) Body weight change after  
 201 250  $\mu$ g/kg IP LPS treatment. BW = body weight.  $\Phi\Phi\Phi$  =  $p < 0.001$  for WT LPS vs.  
 202 TRIFKO LPS in Bonferroni post-hoc comparisons (See Figure 1 – source data 1 for  
 203 food intake and body weight data). N = 5-7/group. C) Plasma corticosterone  
 204 measurement 4 hrs after 250  $\mu$ g/kg IP LPS treatment. N = 5/group. D) Expression of

205 inflammatory cytokine genes 8 hrs after 250 µg/kg IP LPS treatment. All data are  
206 analyzed from  $\Delta$ Ct values and normalized to WT saline group. \*\* =  $p < 0.01$ , \*\*\* =  $p < 0.001$   
207 for Bonferroni post-hoc comparisons. # =  $p < 0.05$ , ## =  $p < 0.01$ , ### =  $p < 0.001$  for  
208 interaction effect in Two-way ANOVA. N = 3-4/group. One outlier was removed in the  
209 TRIFKO LPS groups due to complete lack of behavioral response to LPS. Results are  
210 representative of 2 independent experiments. Figure 1 – figure supplement 1 shows that  
211 MyD88 signaling is intact in TRIFKO mice.

212

### 213 **TRIF is important in acute illness response after ICV LPS challenge**

214 To determine the role of TRIF signaling in the CNS after TLR4 activation, we injected  
215 LPS directly into the brain lateral ventricles of WT and TRIFKO mice at a dose that has  
216 no behavioral effects when injected peripherally (50 ng). While ICV injection of 50 ng  
217 LPS caused a significant decrease in cumulative food intake over 62 hrs after injection  
218 in both WT and TRIFKO mice, LPS-treated TRIFKO mice consumed more than LPS-  
219 treated WT mice starting 36 hrs after treatment (Fig. 2a). Furthermore, TRIFKO mice  
220 treated with ICV LPS showed significantly attenuated weight loss compared to WT mice  
221 treated with ICV LPS at 24 and 36 hrs after injection (Fig. 2b).

222

### 223 **TRIF is required for microglial activation after ICV LPS treatment**

224 TRIF is important for microglia function during states of disease (Hosmane et al., 2012;  
225 Sen Lin et al., 2012). However, no studies have investigated the role of TRIF in  
226 microglial activation after TLR4 stimulation. Therefore, we quantified microglial  
227 activation in the MBH 12 hrs after ICV LPS administration (50 ng) by measuring Iba-1



228 intensity per cell and cell area. While arcuate nucleus microglia in LPS-treated WT mice  
 229 showed a significant increase in size compared to saline-treated WT mice, arcuate  
 230 nucleus microglia in LPS-treated TRIFKO mice did not increase in size compared to  
 231 saline-treated TRIFKO mice (Fig. 2d). In the arcuate nucleus, Iba-1 intensity per  
 232 microglia did not increase in the LPS-treated group for either genotype (Fig. 2e).  
 233 However, overall Iba-1 intensity increased in the median eminence in the WT LPS-  
 234 treated group compared to the WT saline-treated group, but not in the TRIFKO LPS-  
 235 treated group compared to the TRIFKO saline-treated group (Fig. 2f).

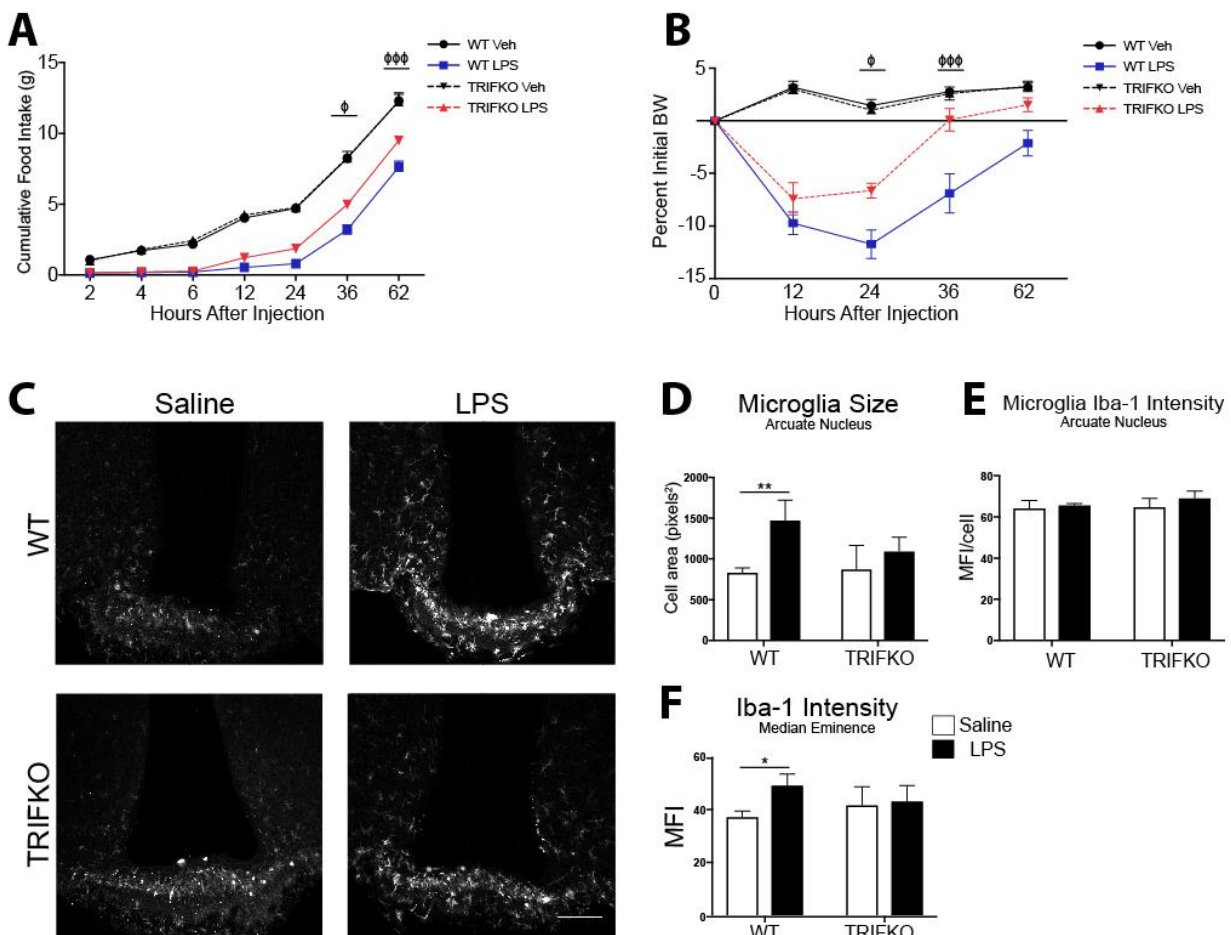

236  
 237 **Figure 2: TRIFKO mice have attenuated acute sickness behavior in response to**  
 238 **central nervous system LPS exposure.** A) Cumulative food intake after 50 ng ICV

239 LPS treatment. Veh = vehicle treatment. B) Body weight change after 50 ng ICV LPS  
240 treatment. BW = body weight.  $\Phi$  =  $p < 0.05$ ,  $\Phi\Phi\Phi$  =  $p < 0.001$  for WT LPS vs. TRIFKO  
241 LPS in Bonferroni post-hoc comparisons. N = 5-6/group (See Figure 2 – source data 1  
242 for food intake and body weight data). C) Representative images of Iba-1  
243 immunoreactivity in 200X magnification images of the MBH in WT and TRIFKO mice  
244 after either 50 ng ICV LPS or saline. Scale bar = 100  $\mu$ m. D) Quantification of arcuate  
245 nucleus microglia size (area) in pixels<sup>2</sup> after either ICV LPS or saline. E) Quantification  
246 of Iba-1 intensity per microglia in the arcuate nucleus in WT and TRIFKO mice after  
247 either ICV LPS or LPS saline. F) Quantification of Iba-1 intensity in the median  
248 eminence in WT and TRIFKO mice after either ICV LPS or LPS saline. \* =  $p < 0.05$ , \*\* =  
249  $p < 0.01$ . n = 4/group. Data shown are representative or pooled data from 2-5  
250 independent experiments.

251

## 252 **TRIF is required for neutrophil recruitment to the brain**

253 Since chemokines comprised the majority of inflammatory transcripts that were less  
254 upregulated in TRIFKO mice after LPS exposure, we hypothesized that TRIF is  
255 important in immune cell recruitment to the brain. We performed flow cytometry on the  
256 brains of WT and TRIFKO mice 12 hrs after 500 ng ICV LPS exposure. We focused on  
257 neutrophils because of previous literature showing they are the predominant cell type in  
258 the brain after LPS exposure (He et al., 2016). We found that compared to saline-  
259 treated WT mice, LPS-treated WT mice had a significantly higher percentage of CD45+  
260 cells in the brain that were neutrophils (Fig. 3a-c). Alternatively, compared to saline-  
261 treated TRIFKO mice, LPS-treated TRIFKO mice did not have an increased percentage

262 of CD45+ cells in the brain that were neutrophils (Fig. 3c). There was no increase in T-  
 263 cells, Ly6C<sup>hi</sup> monocytes, or Ly6C<sup>low</sup> monocytes after LPS exposure in either genotype  
 264 (Fig. 3d).

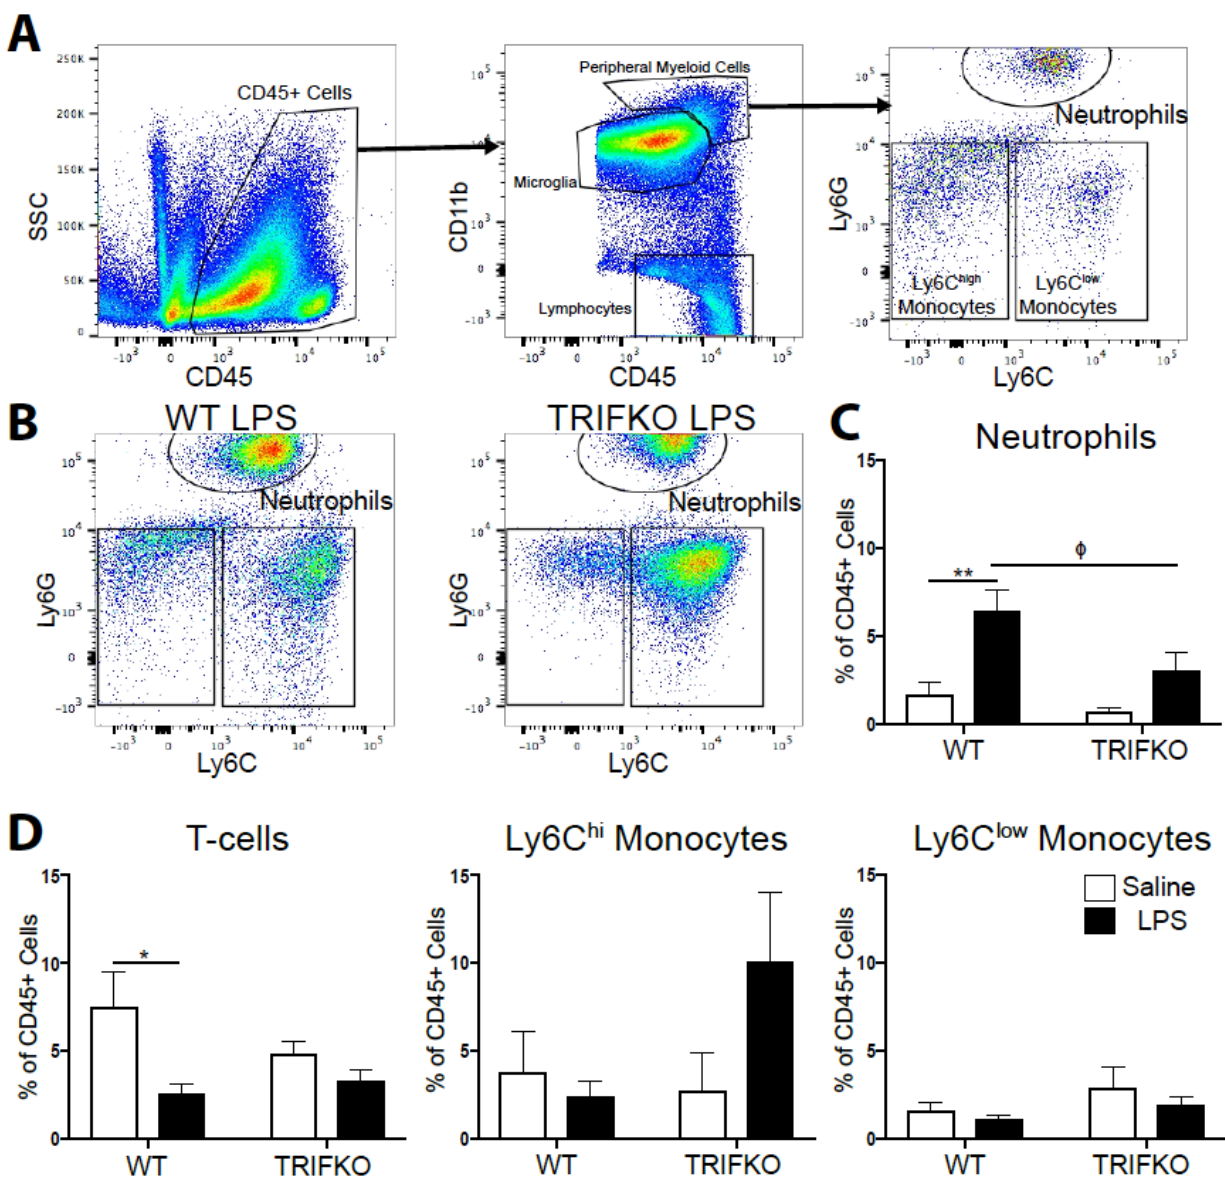

265

266 **Figure 3: TRIF is required for neutrophil recruitment to the brain after ICV LPS.** A)

267 Flow cytometry gating strategy for various immune cell types in the brain from

268 representative WT brain treated with ICV saline. B) Representative flow cytometry plots

269 from WT and TRIFKO brains treated with 500 ng ICV LPS, gated for CD45<sup>high</sup>CD11b+

270 myeloid cells. C) Quantification of neutrophils in the brain as percentage of total CD45+  
271 in WT and TRIFKO brains treated with either ICV LPS or saline. D) Quantification of  
272 CD3+ T-cells, Ly6C<sup>hi</sup> monocytes, and Ly6C<sup>low</sup> monocytes in the brain as percentage of  
273 total CD45+ in WT and TRIFKO brains treated with either ICV LPS or saline. \* = p<0.05,  
274 \*\* = p<0.01. N = 4/group.  $\Phi$  = p <0.05 for WT LPS vs. TRIFKO LPS in Bonferroni post-  
275 hoc comparisons. Data are combined from 4 independent experiments (n = 4). Figure 3  
276 – figure supplement 1 show gating strategy for live singlet cells.

277

### 278 **Mice lacking TRIF have attenuated cancer cachexia**

279 Inflammation is a key component of cachexia (Burfeind et al., 2015), and studies have  
280 shown increased production of inflammatory cytokines in the hypothalamus during  
281 cancer cachexia (Braun et al., 2011; Michaelis et al., 2017). However, mechanisms of  
282 inflammatory signaling in the CNS during cancer cachexia remain unclear. TRIFKO  
283 mice inoculated orthotopically with KPC PDAC cells experienced attenuated anorexia  
284 compared to WT mice with PDAC (Fig. 4a and b). Furthermore, TRIFKO tumor mice  
285 showed attenuated fatigue compared to WT tumor mice (Fig. 4c). WT tumor-bearing  
286 mice showed significantly decreased gastrocnemius mass compared to WT sham-  
287 operated mice while TRIFKO tumor-bearing mice did not show decreased  
288 gastrocnemius mass compared to TRIFKO sham-operated mice (Fig. 4d). These effects  
289 on muscle catabolism were further evidenced by the fact that the E3 ubiquitin-ligase  
290 system genes *Mafbx* and *Murf1* were upregulated in WT tumor animals compared to  
291 WT sham animals, but not significantly upregulated in TRIFKO tumor-bearing animals  
292 (Fig. 4e). The same was true for *Foxo1*, a key transcription factor for muscle catabolism

293 (Sandri et al., 2004). In addition, although *Ccl2* was significantly upregulated in the  
294 hypothalamus of WT tumor animals, it was not in TRIFKO tumor-bearing animals.  
295 Alternatively, compared to WT tumor-bearing animals, *Il1 $\beta$*  was equally upregulated in  
296 the hypothalami of TRIFKO tumor-bearing animals, and *Tnf*, *Il6*, *Cd80*, *Cxcl1*, *Cxcl2*,  
297 and *Cxcl10* were not upregulated in WT or TRIFKO tumor-bearing animals. Lastly,  
298 although *Ccl5* was less upregulated in TRIFKO tumor-bearing animals compared to WT  
299 tumor-bearing animals, this relationship was not significant (Fig. 4f). *Ifn $\beta$*  was excluded  
300 from analysis due to undetectable expression in several samples.

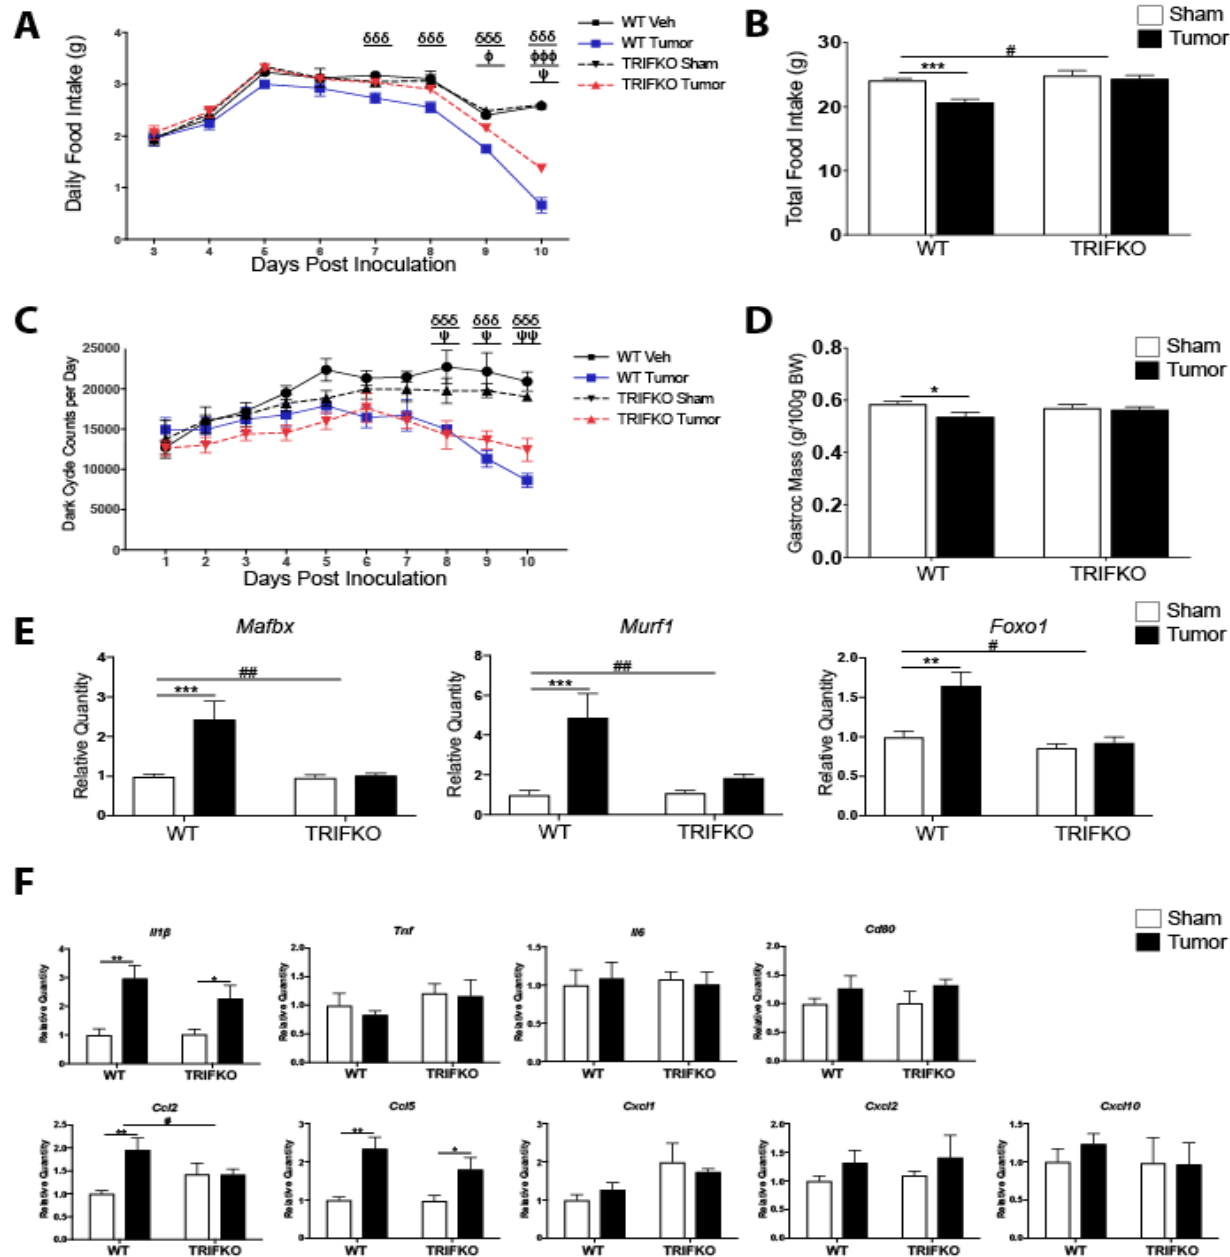

301

302 **Figure 4: TRIFKO mice have attenuated cancer cachexia.** A) Daily food intake after

303 a single orthotopic inoculation of  $3e^6$  KPC tumor cells.  $\delta\delta\delta = p < 0.001$  for WT sham vs.

304 WT tumor in Bonferroni post-hoc comparisons.  $\Phi = p < 0.05$ ,  $\Phi\Phi\Phi = p < 0.001$  for WT

305 tumor vs. TRIFKO tumor in Bonferroni post-hoc comparisons.  $\Psi = p < 0.05$  for TRIFKO

306 sham vs. TRIFKO tumor in Bonferroni post-hoc comparisons. B) Cumulative food intake

307 10 days post inoculation.  $*** = p < 0.001$  for WT sham vs. WT tumor in Bonferroni post-

308 hoc comparisons. # =  $p < 0.05$  for interaction in Two-way ANOVA. C) Movement  
309 quantification after inoculation with KPC tumor cells. Movement quantified using a  
310 Minimitter system with e-mitter implanted subcutaneously in between shoulder blades.  
311  $\delta\delta\delta = p < 0.001$  for WT sham vs. WT tumor in Bonferroni post-hoc comparisons.  $\Psi =$   
312  $p < 0.05$ ,  $\Psi\Psi = p < 0.01$  for TRIFKO sham vs. TRIFKO tumor in Bonferroni post-hoc  
313 comparisons (See Figure 4 – source data 1 for raw minimitter data). D) Muscle  
314 catabolism determined by gastrocnemius mass. Mass of dissected left and right  
315 gastrocnemius was averaged and then divided by initial body weight for normalization  
316 (See Figure 4 – source data 2 for food intake and body weight data). \* =  $p < 0.05$  for WT  
317 sham vs. WT tumor in Bonferroni post-hoc comparisons. E) qRT-PCR analysis of  
318 muscle catabolism genes in gastrocnemius. Expression level for all groups was  
319 normalized to WT sham. \*\* =  $p < 0.01$ , \*\*\* =  $p < 0.001$  for WT sham vs. WT tumor in  
320 Bonferroni post-hoc comparisons. # =  $p < 0.05$ , ## =  $p < 0.01$  for interaction effect in Two-  
321 way ANOVA. F) Expression of inflammatory cytokine genes 10 days after orthotopic  
322 inoculation with KPC tumor cells. All data are analyzed from  $\Delta\text{Ct}$  values and normalized  
323 to WT sham group. \* =  $p < 0.05$ , \*\* =  $p < 0.01$ , \*\*\* =  $p < 0.001$  for WT sham vs. WT tumor in  
324 Bonferroni post-hoc comparisons. # =  $p < 0.05$ , ## =  $p < 0.01$  for interaction effect in Two-  
325 way ANOVA. N = 5/group for all experiments. Data are representative from 3  
326 independent experiments.

327

## 328 Discussion

329 We investigated the role of TRIF in acute sickness behavior after LPS exposure  
330 and in a model of pancreatic cancer cachexia. These studies demonstrated that

331 TRIFKO mice experienced attenuated sickness behavior after peripheral or central LPS  
332 exposure. Furthermore, TRIFKO mice experienced attenuated cachexia during PDAC,  
333 including decreased anorexia, fatigue, muscle catabolism, and hypothalamic  
334 inflammation relative to WT counterparts. These results indicate that TRIF is an  
335 important mediator of inflammation-driven sickness behavior, and should be considered  
336 during the development of anti-inflammatory therapies for cachexia.

337         Several studies investigated the role of MyD88 in sickness behavior (Braun et al.,  
338 2012; Yamawaki, Kimura, Hosoi, & Ozawa, 2010; Zhu, Levasseur, Michaelis, Burfeind,  
339 & Marks, 2016), yet evidence suggests that MyD88-independent signaling pathways are  
340 important in CNS immune activation (Hosmane et al., 2012; Menasria et al., 2013).  
341 While the role of TRIF signaling in acute sickness behavior during viral infection was  
342 investigated previously (Gibney, McGuinness, Prendergast, Harkin, & Connor, 2013;  
343 Murray et al., 2015; Zhu et al., 2016), this is the first to investigate the role of TRIF in  
344 acute sickness behavior after LPS exposure and during cachexia. After systemic  
345 challenge with LPS, TRIFKO mice experienced attenuated anorexia and weight loss  
346 compared to WT mice. This coincided with an attenuated increase in serum  
347 corticosterone, implicating TRIF as a key player in stress response.

348         In addition to attenuated acute sickness behavior after systemic LPS exposure,  
349 TRIFKO mice experienced attenuated anorexia and weight loss after ICV LPS  
350 administration. Interestingly, TRIFKO mice showed similar weight loss 12 hours after  
351 LPS administration, yet recovered more rapidly than WT mice, reaching baseline body  
352 weight 36 hours after injection. These results suggest that in the CNS, MyD88 may



353 drive initial sickness response after TLR4 activation, whereas TRIF signaling may be  
354 involved in maintaining inflammation and subsequent sickness response.

355 In the brain, microglia express TRIF at basal levels, and this expression is  
356 enhanced by various CNS insults (S. Lin et al., 2012; Y. Wang et al., 2013). Review of  
357 the published online database  
358 ([https://web.stanford.edu/group/barres\\_lab/brain\\_rnaseq.html](https://web.stanford.edu/group/barres_lab/brain_rnaseq.html)) confirms that the basal  
359 expression of TRIF (*Ticam1*) is predominantly found in microglia (Zhang et al., 2014).  
360 We found that TRIFKO mice had attenuated microglial activation 12 hrs after ICV LPS  
361 administration. This is in agreement with previous studies showing that that TRIF  
362 expression in microglia is required for normal inflammatory activation and phagocytosis  
363 in response to neuronal injury (Hosmane et al., 2012; Sen Lin et al., 2012).  
364 Furthermore, in a murine model of intracerebral hemorrhage, TRIFKO mice showed  
365 attenuated neurologic disability and neuroinflammation (Sen Lin et al., 2012). In  
366 addition, TLR2 activation in hypothalamic microglia was shown to generate sickness  
367 responses (Jin et al., 2016a), and TRIF is now known to be linked to TLR2 signaling  
368 (Nilsen et al., 2015; Petnicki-Ocwieja et al., 2013). Therefore, our data, in addition to  
369 previous findings, suggest TRIF is important in microglial activation during states of  
370 inflammation, which is important in driving subsequent functional and behavioral  
371 response.

372 We found that TRIFKO mice experienced attenuated hypothalamic inflammation  
373 after systemic LPS exposure. Interestingly, amongst the differentially regulated  
374 transcripts between WT and TRIFKO animals, there was a predominance of chemokine  
375 mRNAs (*Ccl2*, *Ccl5*, *Cxcl1*, *Cxcl10*). Previous studies showed that LPS exposure results

376 in peripheral immune cell recruitment to the brain (He et al., 2016) and that infiltrating  
377 immune cells in the brain drive sickness behavior (D'Mello, Le, & Swain, 2009). Based  
378 on these data, we investigated whether TRIFKO mice had decreased immune cell  
379 infiltration into the brain after ICV LPS exposure and found that TRIF was required for  
380 neutrophil recruitment. While TRIF is known to be important for neutrophil recruitment to  
381 the lungs (Liu et al., 2016), this is the first study to implicate TRIF in neutrophil  
382 recruitment to the brain. This presents a novel mechanism that can be applied to  
383 several pathologies, including CNS infection, cancer, and stroke. Furthermore, no  
384 studies have investigated whether neutrophils are important in sickness behavior or  
385 cachexia.

386         When inflammation is maintained, acute sickness behavior transforms into  
387 cachexia, a maladaptive condition associated with increased mortality and decreased  
388 quality of life during numerous chronic diseases (Bachmann et al., 2008; Lainscak et al.,  
389 2007; Wesseltoft-Rao et al., 2015). While inflammation is critical for cachexia,  
390 mechanisms of inflammatory signaling important for this syndrome remain unclear. We  
391 found that in a mouse model of PDAC-associated cachexia, TRIFKO mice experienced  
392 attenuated anorexia, fatigue, muscle catabolism, and hypothalamic inflammation  
393 compared to WT mice. It is important to note that differences between WT and TRIFKO  
394 mice only emerged 9-10 days after tumor inoculation, suggesting that TRIF is important  
395 in later stages of cachexia. Therefore, it is possible that the MyD88 pathway dominates  
396 in the initiation stage of cachexia. Ruud et al. reported that mice lacking MyD88 in  
397 immune cells experienced attenuated anorexia and muscle catabolism during cancer  
398 cachexia (Ruud et al., 2013). However, their results were similar to ours in that

399 MyD88<sup>ΔMX1Cre</sup> tumor-bearing animals experienced attenuated anorexia compared to WT  
400 tumor-bearing animals at 10 days post inoculation, which was at the end-stage of  
401 cachexia. *MX1* is expressed mainly in cells of the myeloid lineage, suggesting MyD88 in  
402 other cell types, or different inflammatory pathways may be responsible for initiation of  
403 cachexia.

404 The main limitation of the present study is the lack of cell specificity in global  
405 TRIFKO experiments. Future studies are needed to identify the critical cell type involved  
406 in TRIF-mediated sickness behavior and cachexia. Another limitation is the fact that we  
407 performed analysis of cachexia using only one mouse model of cancer cachexia.  
408 Caution is warranted when applying our results to other types of cachexia (heart failure,  
409 cirrhosis, untreated HIV, other types of cancer, etc.). However, this model is extensively  
410 characterized (Michaelis et al., 2017), and recapitulates all of the cardinal features of  
411 cachexia seen in humans. Furthermore, it avoids many of the shortcomings in other  
412 mouse models of cachexia, including: multiple clones with variable cachexia (Kir et al.,  
413 2014), cachexia driven by only a single cytokine (Talbert, Metzger, He, & Guttridge,  
414 2014), and requiring advanced surgical techniques to induce cachexia (DeBoer, 2009).

415 In conclusion, we report that TRIF is important in acute sickness behavior and  
416 cachexia. These results show that TRIF-dependent mechanisms should be considered  
417 when developing therapeutic targets for cachexia. Future studies are needed to identify  
418 the important cell types involved in TRIF signaling during acute illness response and  
419 cachexia.

420  
421  
422  
423

## 424 **Materials and Methods**

425

### 426 **Animals**

427 Male and female 20–25-g WT C57BL/6J (stock no. 000664) and TRIFKO (Trif<sup>Lps2</sup>, stock  
428 no. 005037) mice were obtained from The Jackson Laboratory. Mice were between 7  
429 and 12 weeks of age at time of experiment. All animals were maintained at 27°C on a  
430 normal 12:12 hr light/dark cycle and provided *ad libitum* access to water and food.  
431 Experiments were conducted in accordance with the National Institutes of Health Guide  
432 for the Care and Use of Laboratory Animals, and approved by the Animal Care and Use  
433 Committee of Oregon Health and Science University.

434

### 435 **Intracerebroventricular Cannulation and Injections**

436 Mice were anesthetized under isoflurane and placed on a stereotactic alignment  
437 instrument (Kopf Instruments, CA). 26-gauge lateral ventricle cannulas were placed at  
438 –1.0 mm X, –0.5 mm Y, and –2.25 mm Z relative to bregma. Injections were given in 2  
439  $\mu$ l total volume. LPS (from *Escherichia coli*, O555:B5, Sigma Aldrich, St. Louis, MO) was  
440 dissolved in normal saline with 0.5% bovine serum albumin.

441

### 442 **Nocturnal Feeding Studies**

443 Animals were transferred to clean cages and injected with ICV (50 ng) or IP (250  $\mu$ g)  
444 LPS 1 h prior to lights off. At 2, 6, 12, 24, 36 and 48 hrs after the onset of the dark cycle,  
445 food was weighed and returned to the cage. Body weight was recorded at 12, 24 and 48  
446 hrs.

447

## 448 **Plasma Corticosterone Measurement**

449 Plasma corticosterone levels were measured by RIA (MP Biomedicals, Valiant, Yantai,  
450 China) according to the manufacturer's instructions. Animals were anesthetized with a  
451 lethal dose of a ketamine/xylazine/acetapromide 4 hrs after IP LPS administration.  
452 Blood was obtained by cardiac puncture, anticoagulated with EDTA and separated by  
453 centrifugation. Plasma was stored at  $-80^{\circ}\text{C}$  until analysis.

454

## 455 **Quantitative Real-Time PCR**

456 Prior to tissue extraction, mice were euthanized with a lethal dose of a  
457 ketamine/xylazine/acetapromide and sacrificed. Hypothalamic blocks were dissected,  
458 snap frozen, and stored in  $-80^{\circ}\text{C}$  until analysis. Hypothalamic RNA was extracted  
459 using an RNeasy mini kit (Qiagen, Hilden, Germany) according to the manufacturer's  
460 instructions. cDNA was transcribed using TaqMan reverse transcription reagents and  
461 random hexamers according to the manufacturer's instructions. PCR reactions were run  
462 on an ABI 7300 (Applied Biosystems), using TaqMan universal PCR master mix with  
463 the following TaqMan mouse gene expression assays: *18s* (Mm04277571\_s1), *Il1b*  
464 (Mm00434228\_m1), *Tnf* (Mm00443258\_m1), *Il6* (Mm01210732\_g1), *Cd80*  
465 (Mm00711660\_m1), *Myd88* (Mm00440338\_m1), *Ifnb1* (Mm00439552\_s1), *Ccl2*  
466 (Mm99999056\_m1), *Ccl5* (Mm01302427\_m1), *Cxcl1* (Mm04207460\_m1), *Cxcl2*  
467 (Mm00436450\_m1), *Cxcl10* (Mm00445235\_m1), *Gapdh* (Mm99999915\_g1),  
468 *Mafbx* (Mm00499518\_m1), *Murf1* (Mm01185221\_m1), and *Foxo1* (Mm00490672\_m1).

469 Relative expression was calculated using the  $\Delta\Delta C_t$  method and normalized to  
470 vehicle treated or sham control. Statistical analysis was performed on the normally  
471 distributed  $\Delta C_t$  values.

472

### 473 **Immunohistochemistry**

474 Mice were anesthetized using a ketamine/xylazine/acetapromide cocktail and  
475 sacrificed by transcardial perfusion fixation with 15 mL ice cold 0.01 M PBS followed by  
476 25 mL 4% paraformaldehyde (PFA) in 0.01 M PBS. Brains were post-fixed in 4% PFA  
477 overnight at 4°C and cryoprotected in 20% sucrose for 24 hrs at 4°C before being  
478 stored at -80°C until used for immunohistochemistry. Immunofluorescence  
479 histochemistry was performed as described below. Free-floating sections were cut at 30  
480  $\mu\text{m}$  from perfused brains using a sliding microtome (Leica SM2000R, Leica  
481 Microsystems, Wetzlar, Germany). Hypothalamic sections were collected from the  
482 division of the optic chiasm (bregma -1.0 mm) caudally through the mammillary bodies  
483 (bregma -3.0 mm). The sections were incubated for 30 min at room temperature in  
484 blocking reagent (5% normal donkey serum in 0.01 M PBS and 0.3% Triton X-100).  
485 After the initial blocking step, the sections were incubated in rabbit anti-mouse Iba-1  
486 (1:500, DAKO) in blocking reagent for 24 hrs at 4°C, followed by incubation in donkey  
487 anti-rabbit Alexa 555 (1:1000) for 2 hrs at room temperature. Between each stage, the  
488 sections were washed thoroughly with 0.01 M PBS. Sections were mounted onto  
489 gelatin-coated slides and coverslipped using Prolong Gold Antifade media with DAPI  
490 (Thermofisher, Waltham, MA).

491

## 492 **Microglia Activation Quantification**

493 Microglia activation in the MBH was quantified using Fiji (ImageJ, NIH, Bethesda,  
494 MD). The MBH was defined as the region surrounding the third ventricle at the base of  
495 the brain, starting rostrally at the end of the optic chiasm when the arcuate nucleus  
496 appears (-1.22 mm from bregma) and ending caudally at the mammillary body (-2.70  
497 mm from bregma). Images were acquired using the 20X objective (na=0.8, step size=1  
498  $\mu\text{m}$ ), with the base of the MBH positioned at the very bottom of the field of view (FOV)  
499 and the third ventricle at the center of the FOV. Care was taken to exclude the  
500 meninges so as to avoid analysis of meningeal macrophages. Images were 2048 x  
501 2048 pixels, with a pixel size of 0.315  $\mu\text{m}$ . Images were acquired as 8-bit RGB TIFF  
502 images. 3-10 MBH images per animal were acquired and analyzed.

503 After image acquisition, TIFF images were uploaded to Fiji and converted to 8-bit  
504 greyscale images. After thresholding, microglia were identified using the Analyze  
505 Particle function, which measured mean Iba-1 fluorescent intensity per cell and cell  
506 area. Iba-1 fluorescent intensity and cell size was measured for each microglia in the  
507 arcuate nucleus. Due to the density of microglia in the median eminence (ME), the  
508 software was unable to differentiate individual cells. As such, overall Iba-1 fluorescent  
509 intensity was measured to quantify microglia activation in the ME.

510

## 511 **Flow Cytometry**

512 12 hrs after 500 ng ICV LPS administration, mice were anesthetized using a  
513 ketamine/xylazine/acetapromide cocktail and perfused with 15 mL ice cold 0.01 M PBS  
514 to remove circulating leukocytes. After perfusion, brains were extracted and minced in a

515 digestion solution containing 1 mg/mL type II collagenase (Sigma) and 1% DNase  
516 (Sigma) in RPMI, then placed in a 37°C incubator for 1 hr. After digestion, myelin was  
517 removed via using 30% percoll in RPMI. Isolated cells were washed with RPMI,  
518 incubated in Fc block for 5 min, then stained with the following antibodies (all rat anti-  
519 mouse from BioLegend, except for Live/Dead) (BioLegend, San Diego, CA): anti-CD45  
520 PerCP/Cy5.5 (1:400), anti-CD11b APC (1:800), anti-Ly6C PerCP (1:100), anti-Ly6G  
521 PE/Cy7 (1:800), anti-CD3 PE (1:100), and Live/Dead fixable aqua (1:200,  
522 Thermofisher). Flow cytometry was conducted using a Fortessa analytic flow cytometer  
523 (BD Biosciences, NJ), and analysis was performed on FlowJo V10 software (FlowJo,  
524 Ashland, OR). Cells were gated on LD, SSC singlet, and FSC singlet (Fig. 3 – figure  
525 supplement 1). Leukocytes were then defined as CD45+ cells and identified as either  
526 peripheral myeloid cells (CD45<sup>high</sup>CD11b+) or lymphocytes (CD45<sup>high</sup>CD11b-). From  
527 peripheral myeloid cells Ly6C<sup>low</sup> monocytes (Ly6C<sup>low</sup>Ly6G-), Ly6C<sup>high</sup> monocytes  
528 (Ly6C<sup>high</sup>Ly6G-), and neutrophils (Ly6C<sup>mid</sup>Ly6G+) were identified. From lymphocytes,  
529 CD3+ cells were identified as T-cells.

530

### 531 **KPC Cancer Cachexia Model**

532 Our lab generated a mouse model of pancreatic ductal adenocarcinoma (PDAC) –  
533 associated cachexia by injection of murine-derived KPC PDAC cells (originally provided  
534 by Dr. Elizabeth Jaffee from Johns Hopkins) (Michaelis et al., 2017). These cells are  
535 derived from tumors in mice with KRAS<sup>G12D</sup> and TP53<sup>R172H</sup> deleted via the PDX-1-Cre  
536 driver (Foley et al., 2015). Cells were maintained in RPMI supplemented with 10% heat-  
537 inactivated FBS, and 50 U/mL penicillin/streptomycin (Gibco, Thermofisher), in



538 incubators maintained at 37°C and 5% CO<sub>2</sub>. In the week prior to tumor implantation,  
539 animals were transitioned to individual housing to acclimate to experimental conditions.  
540 Animal food intake and body weight were monitored daily. Mice were inoculated  
541 orthotopically with 3 million KPC tumor cells in 40 µL PBS into the tail of the pancreas  
542 (Chai, Kim-Fuchs, Angst, & Sloan, 2013). Sham-operated animals received heat-killed  
543 cells in the same volume. NMR measurements were taken at the beginning of the study  
544 for covariate adaptive randomization of tumor and sham groups to ensure equally  
545 distributed weight and body composition. Body temperature and voluntary home cage  
546 locomotor activity were measured via MiniMitter tracking devices (Starr Life Sciences,  
547 Oakmont, PA). Mice were implanted 7 days prior to tumor implantation with MiniMitter  
548 transponders in the intrascapular subcutaneous space. Using these devices, movement  
549 counts in x-axis, y-axis, and z-axis were recorded in 5 min intervals.

550

### 551 **Statistical Analysis**

552 Data are expressed as means ± SEM. Statistical analysis was performed with Prism 7.0  
553 software (Graphpad Software Corp, La Jolla, CA). All data were analyzed with a Two-  
554 way ANOVA followed with *post hoc* analysis with a Bonferroni *post hoc* test or  
555 Student's *t* test as appropriate. For all analyses, significance was assigned at the level  
556 of  $p < 0.05$ .

557

### 558 **Competing Interests**

559 The authors have no competing interests to report.

560

## 561 References Cited

- 562
- 563 Anker, S. D., Ponikowski, P., Varney, S., Chua, T. P., Clark, A. L., Webb-Peploe, K. M., Harrington,  
564 D., Kox, W. J., Poole-Wilson, P. A., & Coats, A. J. (1997). Wasting as independent risk  
565 factor for mortality in chronic heart failure. *Lancet*, *349*(9058), 1050-1053.
- 566 Argiles, J. M., Anker, S. D., Evans, W. J., Morley, J. E., Fearon, K. C., Strasser, F., Muscaritoli, M.,  
567 & Baracos, V. E. (2010). Consensus on cachexia definitions. *J Am Med Dir Assoc*, *11*(4),  
568 229-230. doi:10.1016/j.jamda.2010.02.004
- 569 Bachmann, J., Heiligensetzer, M., Krakowski-Roosen, H., Buchler, M. W., Friess, H., &  
570 Martignoni, M. E. (2008). Cachexia worsens prognosis in patients with resectable  
571 pancreatic cancer. *J Gastrointest Surg*, *12*(7), 1193-1201. doi:10.1007/s11605-008-0505-  
572 z
- 573 Bluthé, R.-M., Michaud, B., Poli, V., & Dantzer, R. (2000). Role of IL-6 in cytokine-induced  
574 sickness behavior: a study with IL-6 deficient mice. *Physiol Behav*, *70*(3-4), 367-373.  
575 doi:[https://doi.org/10.1016/S0031-9384\(00\)00269-9](https://doi.org/10.1016/S0031-9384(00)00269-9)
- 576 Bodnar, R. J., Pasternak, G. W., Mann, P. E., Paul, D., Warren, R., & Donner, D. B. (1989).  
577 Mediation of anorexia by human recombinant tumor necrosis factor through a  
578 peripheral action in the rat. *Cancer Res*, *49*(22), 6280-6284.
- 579 Braun, T. P., Grossberg, A. J., Veleva-Rotse, B. O., Maxson, J. E., Szumowski, M., Barnes, A. P., &  
580 Marks, D. L. (2012). Expression of myeloid differentiation factor 88 in neurons is not  
581 requisite for the induction of sickness behavior by interleukin-1beta. *J*  
582 *Neuroinflammation*, *9*, 229. doi:10.1186/1742-2094-9-229
- 583 Braun, T. P., Zhu, X., Szumowski, M., Scott, G. D., Grossberg, A. J., Levasseur, P. R., Graham, K.,  
584 Khan, S., Damaraju, S., Colmers, W. F., Baracos, V. E., & Marks, D. L. (2011). Central  
585 nervous system inflammation induces muscle atrophy via activation of the  
586 hypothalamic-pituitary-adrenal axis. *J Exp Med*, *208*(12), 2449-2463.  
587 doi:10.1084/jem.20111020
- 588 Burfeind, K. G., Michaelis, K. A., & Marks, D. L. (2015). The central role of hypothalamic  
589 inflammation in the acute illness response and cachexia. *Semin Cell Dev Biol*.  
590 doi:10.1016/j.semcdb.2015.10.038
- 591 Chai, M. G., Kim-Fuchs, C., Angst, E., & Sloan, E. K. (2013). Bioluminescent orthotopic model of  
592 pancreatic cancer progression. *J Vis Exp*(76). doi:10.3791/50395
- 593 D'Mello, C., Le, T., & Swain, M. G. (2009). Cerebral microglia recruit monocytes into the brain in  
594 response to tumor necrosis factoralpha signaling during peripheral organ inflammation.  
595 *J Neurosci*, *29*(7), 2089-2102. doi:10.1523/jneurosci.3567-08.2009
- 596 Dantzer, R., Bluthé, R.-M., Layé, S., Bret-Dibat, J.-L., Parnet, P., & Kelley, K. W. (1998). Cytokines  
597 and Sickness Behavior. *Ann N Y Acad Sci*, *840*(1), 586-590. doi:10.1111/j.1749-  
598 6632.1998.tb09597.x
- 599 DeBoer, M. D. (2009). Animal models of anorexia and cachexia. *Expert opinion on drug*  
600 *discovery*, *4*(11), 1145-1155. doi:10.1517/17460440903300842
- 601 Elmquist, J. K., Scammell, T. E., Jacobsen, C. D., & Saper, C. B. (1996). Distribution of Fos-like  
602 immunoreactivity in the rat brain following intravenous lipopolysaccharide  
603 administration. *J Comp Neurol*, *371*(1), 85-103.

- 604 Evans, W. J., Morley, J. E., Argiles, J., Bales, C., Baracos, V., Guttridge, D., Jatoi, A., Kalantar-  
605 Zadeh, K., Lochs, H., Mantovani, G., Marks, D., Mitch, W. E., Muscaritoli, M., Najand, A.,  
606 Ponikowski, P., Rossi Fanelli, F., Schambelan, M., Schols, A., Schuster, M., Thomas, D.,  
607 Wolfe, R., & Anker, S. D. (2008). Cachexia: a new definition. *Clin Nutr*, 27(6), 793-799.  
608 doi:10.1016/j.clnu.2008.06.013
- 609 Fearon, K., Strasser, F., Anker, S. D., Bosaeus, I., Bruera, E., Fainsinger, R. L., Jatoi, A., Loprinzi,  
610 C., MacDonald, N., Mantovani, G., Davis, M., Muscaritoli, M., Ottery, F., Radbruch, L.,  
611 Ravasco, P., Walsh, D., Wilcock, A., Kaasa, S., & Baracos, V. E. (2011). Definition and  
612 classification of cancer cachexia: an international consensus. *Lancet Oncol*, 12(5), 489-  
613 495. doi:10.1016/S1470-2045(10)70218-7
- 614 Feng, Y., Zou, L., Zhang, M., Li, Y., Chen, C., & Chao, W. (2011). MyD88 and Trif signaling play  
615 distinct roles in cardiac dysfunction and mortality during endotoxin shock and  
616 polymicrobial sepsis. *Anesthesiology*, 115(3), 555-567.  
617 doi:10.1097/ALN.0b013e31822a22f7
- 618 Foley, K., Rucki, A. A., Xiao, Q., Zhou, D., Leubner, A., Mo, G., Kleponis, J., Wu, A. A., Sharma, R.,  
619 Jiang, Q., Anders, R. A., Iacobuzio-Donahue, C. A., Hajjar, K. A., Maitra, A., Jaffee, E. M.,  
620 & Zheng, L. (2015). Semaphorin 3D autocrine signaling mediates the metastatic role of  
621 annexin A2 in pancreatic cancer. *Sci Signal*, 8(388), ra77. doi:10.1126/scisignal.aaa5823
- 622 Gibney, S. M., McGuinness, B., Prendergast, C., Harkin, A., & Connor, T. J. (2013). Poly I:C-  
623 induced activation of the immune response is accompanied by depression and anxiety-  
624 like behaviours, kynurenine pathway activation and reduced BDNF expression. *Brain*  
625 *Behav Immun*, 28(Supplement C), 170-181.  
626 doi:<https://doi.org/10.1016/j.bbi.2012.11.010>
- 627 Gong, S., Miao, Y.-L., Jiao, G.-Z., Sun, M.-J., Li, H., Lin, J., Luo, M.-J., & Tan, J.-H. (2015). Dynamics  
628 and Correlation of Serum Cortisol and Corticosterone under Different Physiological or  
629 Stressful Conditions in Mice. *PLoS One*, 10(2), e0117503.  
630 doi:10.1371/journal.pone.0117503
- 631 Grossberg, A. J., Zhu, X., Leininger, G. M., Levasseur, P. R., Braun, T. P., Myers, M. G., Jr., &  
632 Marks, D. L. (2011). Inflammation-induced lethargy is mediated by suppression of orexin  
633 neuron activity. *J Neurosci*, 31(31), 11376-11386. doi:10.1523/JNEUROSCI.2311-11.2011
- 634 Hanke, M. L., & Kielian, T. (2011). Toll-like receptors in health and disease in the brain:  
635 mechanisms and therapeutic potential. *Clinical science (London, England : 1979)*, 121(9),  
636 367-387. doi:10.1042/CS20110164
- 637 He, H., Geng, T., Chen, P., Wang, M., Hu, J., Kang, L., Song, W., & Tang, H. (2016). NK cells  
638 promote neutrophil recruitment in the brain during sepsis-induced neuroinflammation.  
639 *Scientific Reports*, 6, 27711. doi:10.1038/srep27711
- 640 Hosmane, S., Tegenge, M. A., Rajbhandari, L., Uapinyoying, P., Kumar, N. G., Thakor, N., &  
641 Venkatesan, A. (2012). TRIF mediates microglial phagocytosis of degenerating axons.  
642 *The Journal of Neuroscience*, 32(22), 7745-7757. doi:10.1523/JNEUROSCI.0203-12.2012
- 643 Jin, S., Kim, J. G., Park, J. W., Koch, M., Horvath, T. L., & Lee, B. J. (2016a). Hypothalamic TLR2  
644 triggers sickness behavior via a microglia-neuronal axis. *6*, 29424.  
645 doi:10.1038/srep29424  
646 <https://www.nature.com/articles/srep29424-supplementary-information>

- 647 Jin, S., Kim, J. G., Park, J. W., Koch, M., Horvath, T. L., & Lee, B. J. (2016b). Hypothalamic TLR2  
648 triggers sickness behavior via a microglia-neuronal axis. *Scientific Reports*, *6*, 29424.  
649 doi:10.1038/srep29424  
650 <https://www.nature.com/articles/srep29424-supplementary-information>
- 651 Kir, S., White, J. P., Kleiner, S., Kazak, L., Cohen, P., Baracos, V. E., & Spiegelman, B. M. (2014).  
652 Tumour-derived PTH-related protein triggers adipose tissue browning and cancer  
653 cachexia. *Nature*, *513*(7516), 100-104. doi:10.1038/nature13528
- 654 Konsman, J. P., Tridon, V., & Dantzer, R. (2000). Diffusion and action of  
655 intracerebroventricularly injected interleukin-1 in the CNS. *Neuroscience*, *101*(4), 957-  
656 967.
- 657 Kotler, D. P., Tierney, A. R., Wang, J., & Pierson, R. N. J. (1989). Magnitude of body-cell-mass  
658 depletion and the timing of death from wasting in AIDS. *Am. J. Clin. Nutr.*, *50*(3), 444-  
659 447.
- 660 Laflamme, N., & Rivest, S. (1999). Effects of systemic immunogenic insults and circulating  
661 proinflammatory cytokines on the transcription of the inhibitory factor kappaB alpha  
662 within specific cellular populations of the rat brain. *J Neurochem*, *73*(1), 309-321.
- 663 Lainscak, M., Podbregar, M., & Anker, S. D. (2007). How does cachexia influence survival in  
664 cancer, heart failure and other chronic diseases? *Curr Opin Support Palliat Care*, *1*(4),  
665 299-305.
- 666 Lin, S., Yin, Q., Zhong, Q., Lv, F.-L., Zhou, Y., Li, J.-Q., Wang, J.-Z., Su, B.-y., & Yang, Q.-W. (2012).  
667 Heme activates TLR4-mediated inflammatory injury via MyD88/TRIF signaling pathway  
668 in intracerebral hemorrhage. *J Neuroinflammation*, *9*(1), 46. doi:10.1186/1742-2094-9-  
669 46
- 670 Lin, S., Yin, Q., Zhong, Q., Lv, F. L., Zhou, Y., Li, J. Q., Wang, J. Z., Su, B. Y., & Yang, Q. W. (2012).  
671 Heme activates TLR4-mediated inflammatory injury via MyD88/TRIF signaling pathway  
672 in intracerebral hemorrhage. *J Neuroinflammation*, *9*, 46. doi:10.1186/1742-2094-9-46
- 673 Liu, Y., Gu, Y., Han, Y., Zhang, Q., Jiang, Z., Zhang, X., Huang, B., Xu, X., Zheng, J., & Cao, X.  
674 (2016). Tumor Exosomal RNAs Promote Lung Pre-metastatic Niche Formation by  
675 Activating Alveolar Epithelial TLR3 to Recruit Neutrophils. *Cancer Cell*, *30*(2), 243-256.  
676 doi:10.1016/j.ccell.2016.06.021
- 677 Medzhitov, R., Preston-Hurlburt, P., Kopp, E., Stadlen, A., Chen, C., Ghosh, S., & Janeway, C. A.,  
678 Jr. (1998). MyD88 is an adaptor protein in the hToll/IL-1 receptor family signaling  
679 pathways. *Mol Cell*, *2*(2), 253-258.
- 680 Menasria, R., Boivin, N., Lebel, M., Piret, J., Gosselin, J., & Boivin, G. (2013). Both TRIF and IPS-1  
681 adaptor proteins contribute to the cerebral innate immune response against HSV-1  
682 infection. *J Virol*. doi:10.1128/JVI.00591-13
- 683 Michaelis, K. A., Zhu, X., Burfeind, K. G., Krasnow, S. M., Lévassieur, P. R., Morgan, T. K., &  
684 Marks, D. L. (2017). Establishment and characterization of a novel murine model of  
685 pancreatic cancer cachexia. *J Cachexia Sarcopenia Muscle*, *8*(5), 824-838.  
686 doi:10.1002/jcsm.12225
- 687 Morgan, J. I., & Curran, T. (1986). Role of ion flux in the control of c-fos expression. *Nature*,  
688 *322*(6079), 552-555. doi:10.1038/322552a0
- 689 Murray, C., Griffin, É. W., O'Loughlin, E., Lyons, A., Sherwin, E., Ahmed, S., Stevenson, N. J.,  
690 Harkin, A., & Cunningham, C. (2015). Interdependent and independent roles of type I

- 691 interferons and IL-6 in innate immune, neuroinflammatory and sickness behaviour  
692 responses to systemic poly I:C. *Brain Behav Immun*, 48, 274-286.  
693 doi:10.1016/j.bbi.2015.04.009
- 694 Muzio, M., Ni, J., Feng, P., & Dixit, V. M. (1997). IRAK (Pelle) family member IRAK-2 and MyD88  
695 as proximal mediators of IL-1 signaling. *Science*, 278(5343), 1612-1615.
- 696 Nilsen, N. J., Vladimer, G. I., Stenvik, J., Orning, M. P., Zeid-Kilani, M. V., Bugge, M., Bergstroem,  
697 B., Conlon, J., Husebye, H., Hise, A. G., Fitzgerald, K. A., Espevik, T., & Lien, E. (2015). A  
698 role for the adaptor proteins TRAM and TRIF in toll-like receptor 2 signaling. *J Biol Chem*,  
699 290(6), 3209-3222. doi:10.1074/jbc.M114.593426
- 700 Petnicki-Ocwieja, T., Chung, E., Acosta, D. I., Ramos, L. T., Shin, O. S., Ghosh, S., Kobzik, L., Li, X.,  
701 & Hu, L. T. (2013). TRIF Mediates Toll-Like Receptor 2-Dependent Inflammatory  
702 Responses to *Borrelia burgdorferi*. *Infect Immun*, 81(2), 402-410. doi:10.1128/IAI.00890-  
703 12
- 704 Ruud, J., Wilhelms, D. B., Nilsson, A., Eskilsson, A., Tang, Y.-J., Ströhle, P., Caesar, R.,  
705 Schwaninger, M., Wunderlich, T., Bäckhed, F., Engblom, D., & Blomqvist, A. (2013).  
706 Inflammation- and tumor-induced anorexia and weight loss require MyD88 in  
707 hematopoietic/myeloid cells but not in brain endothelial or neural cells. *The FASEB*  
708 *Journal*, 27(5), 1973-1980. doi:10.1096/fj.12-225433
- 709 Sandri, M., Sandri, C., Gilbert, A., Skurk, C., Calabria, E., Picard, A., Walsh, K., Schiaffino, S.,  
710 Lecker, S. H., & Goldberg, A. L. (2004). Foxo transcription factors induce the atrophy-  
711 related ubiquitin ligase atrogin-1 and cause skeletal muscle atrophy. *Cell*, 117(3), 399-  
712 412.
- 713 Sonti, G., Ilyin, S. E., & Plata-Salaman, C. R. (1996). Anorexia induced by cytokine interactions at  
714 pathophysiological concentrations. *Am J Physiol*, 270(6 Pt 2), R1394-1402.
- 715 Talbert, E. E., Metzger, G. A., He, W. A., & Guttridge, D. C. (2014). Modeling human cancer  
716 cachexia in colon 26 tumor-bearing adult mice. *Journal of Cachexia, Sarcopenia and*  
717 *Muscle*, 5(4), 321-328. doi:10.1007/s13539-014-0141-2
- 718 Tisdale, M. J. (2002). Cachexia in cancer patients. *Nat Rev Cancer*, 2(11), 862-871.
- 719 Wang, A. Y., Sea, M. M., Tang, N., Sanderson, J. E., Lui, S. F., Li, P. K., & Woo, J. (2004). Resting  
720 energy expenditure and subsequent mortality risk in peritoneal dialysis patients. *J Am*  
721 *Soc Nephrol*, 15(12), 3134-3143. doi:10.1097/01.asn.0000144206.29951.b2
- 722 Wang, Y., He, H., Li, D., Zhu, W., Duan, K., Le, Y., Liao, Y., & Ou, Y. (2013). The role of the TLR4  
723 signaling pathway in cognitive deficits following surgery in aged rats. *Mol Med Rep*, 7(4),  
724 1137-1142. doi:10.3892/mmr.2013.1322
- 725 Wesseltoft-Rao, N., Hjermland, M. J., Ikdahl, T., Dajani, O., Ulven, S. M., Iversen, P. O., & Bye, A.  
726 (2015). Comparing two classifications of cancer cachexia and their association with  
727 survival in patients with unresected pancreatic cancer. *Nutr Cancer*, 67(3), 472-480.  
728 doi:10.1080/01635581.2015.1004728
- 729 Wisse, B. E., Ogimoto, K., Tang, J., Harris, M. K., Jr., Raines, E. W., & Schwartz, M. W. (2007).  
730 Evidence that lipopolysaccharide-induced anorexia depends upon central, rather than  
731 peripheral, inflammatory signals. *Endocrinology*, 148(11), 5230-5237.  
732 doi:10.1210/en.2007-0394
- 733 Yamamoto, M., Sato, S., Hemmi, H., Hoshino, K., Kaisho, T., Sanjo, H., Takeuchi, O., Sugiyama,  
734 M., Okabe, M., Takeda, K., & Akira, S. (2003). Role of adaptor TRIF in the MyD88-

735 independent toll-like receptor signaling pathway. *Science*, 301(5633), 640-643.  
736 doi:10.1126/science.1087262  
737 Yamawaki, Y., Kimura, H., Hosoi, T., & Ozawa, K. (2010). MyD88 plays a key role in LPS-induced  
738 Stat3 activation in the hypothalamus. *American Journal of Physiology - Regulatory,*  
739 *Integrative and Comparative Physiology*, 298(2), R403.  
740 Zhang, Y., Chen, K., Sloan, S. A., Bennett, M. L., Scholze, A. R., O'Keeffe, S., Phatnani, H. P.,  
741 Guarnieri, P., Caneda, C., Ruderisch, N., Deng, S., Liddelow, S. A., Zhang, C., Daneman, R.,  
742 Maniatis, T., Barres, B. A., & Wu, J. Q. (2014). An RNA-Sequencing Transcriptome and  
743 Splicing Database of Glia, Neurons, and Vascular Cells of the Cerebral Cortex. *The*  
744 *Journal of Neuroscience*, 34(36), 11929-11947. doi:10.1523/JNEUROSCI.1860-14.2014  
745 Zhu, X., Levasseur, P. R., Michaelis, K. A., Burfeind, K. G., & Marks, D. L. (2016). A distinct brain  
746 pathway links viral RNA exposure to sickness behavior. *Sci Rep*, 6, 29885.  
747 doi:10.1038/srep29885  
748  
749  
750  
751  
752  
753  
754  
755  
756  
757  
758  
759  
760  
761  
762  
763  
764  
765  
766  
767  
768  
769  
770  
771  
772  
773  
774  
775  
776  
777  
778  
779  
780

781 Supplemental Tables and Figures

782

783 Figure 1 – Figure Supplement 1

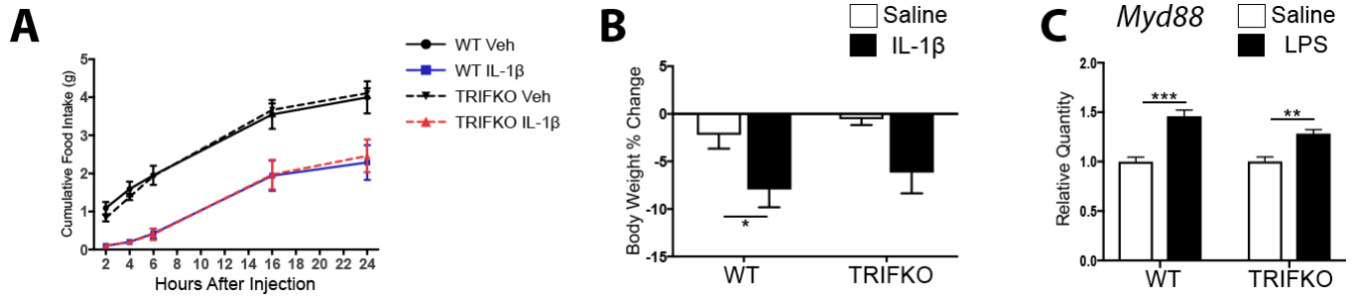

784

785

786

787

788

789

790

791

792

793

794

795

796

797

798

799

800

801

802

803

804

805

806

807

808

809

810

811

812

813

814

815

816

817

818

819

820 **Figure 3 – Figure Supplement 1**

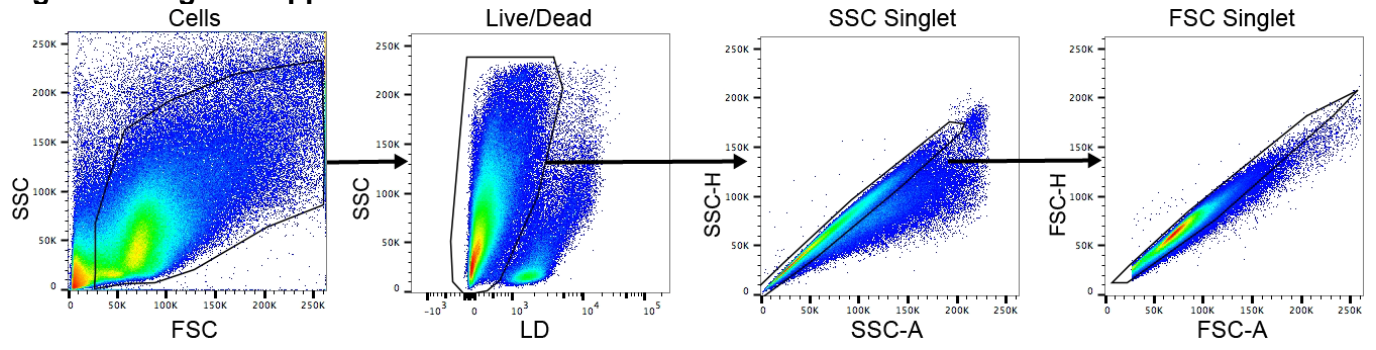

821  
822

823

824

825

826

827

828

829

830

831

832

833

834

835

836

837

838

839

840

841

842

843

844

845

846

847

848

849

850

851

852

853



854 **Supplemental Table and Figure Legends**

855

856 **Figure 1 – Figure Supplement 1: MyD88 signaling is intact in TRIFKO mice. A)**

857 Cumulative food intake after 10 ng ICV IL-1 $\beta$  in artificial CSF or vehicle (artificial CSF  
858 only) treatment. B) Body weight change from initial after 10 ng ICV IL-1 $\beta$  in artificial CSF  
859 or vehicle (artificial CSF only) treatment. N=6-8/group. C) qRT-PCR for *Myd88* gene  
860 expression in WT and TRIFKO mice. LPS = 8 hrs after 250  $\mu$ g/kg IP LPS treatment. N =  
861 3-4/group. \* =  $p < 0.05$ , \*\* =  $p < 0.01$ , \*\*\* =  $p < 0.001$  for two-way ANOVA Bonferroni post-  
862 hoc testing.

863

864 **Figure 3 – Figure Supplement 1: Flow cytometry gating strategy. Representative**

865 plots from FlowJo V10 software. SSC = side scatter. FSC = forward scatter. A = area. H  
866 = height. LD = Live/Dead.

867

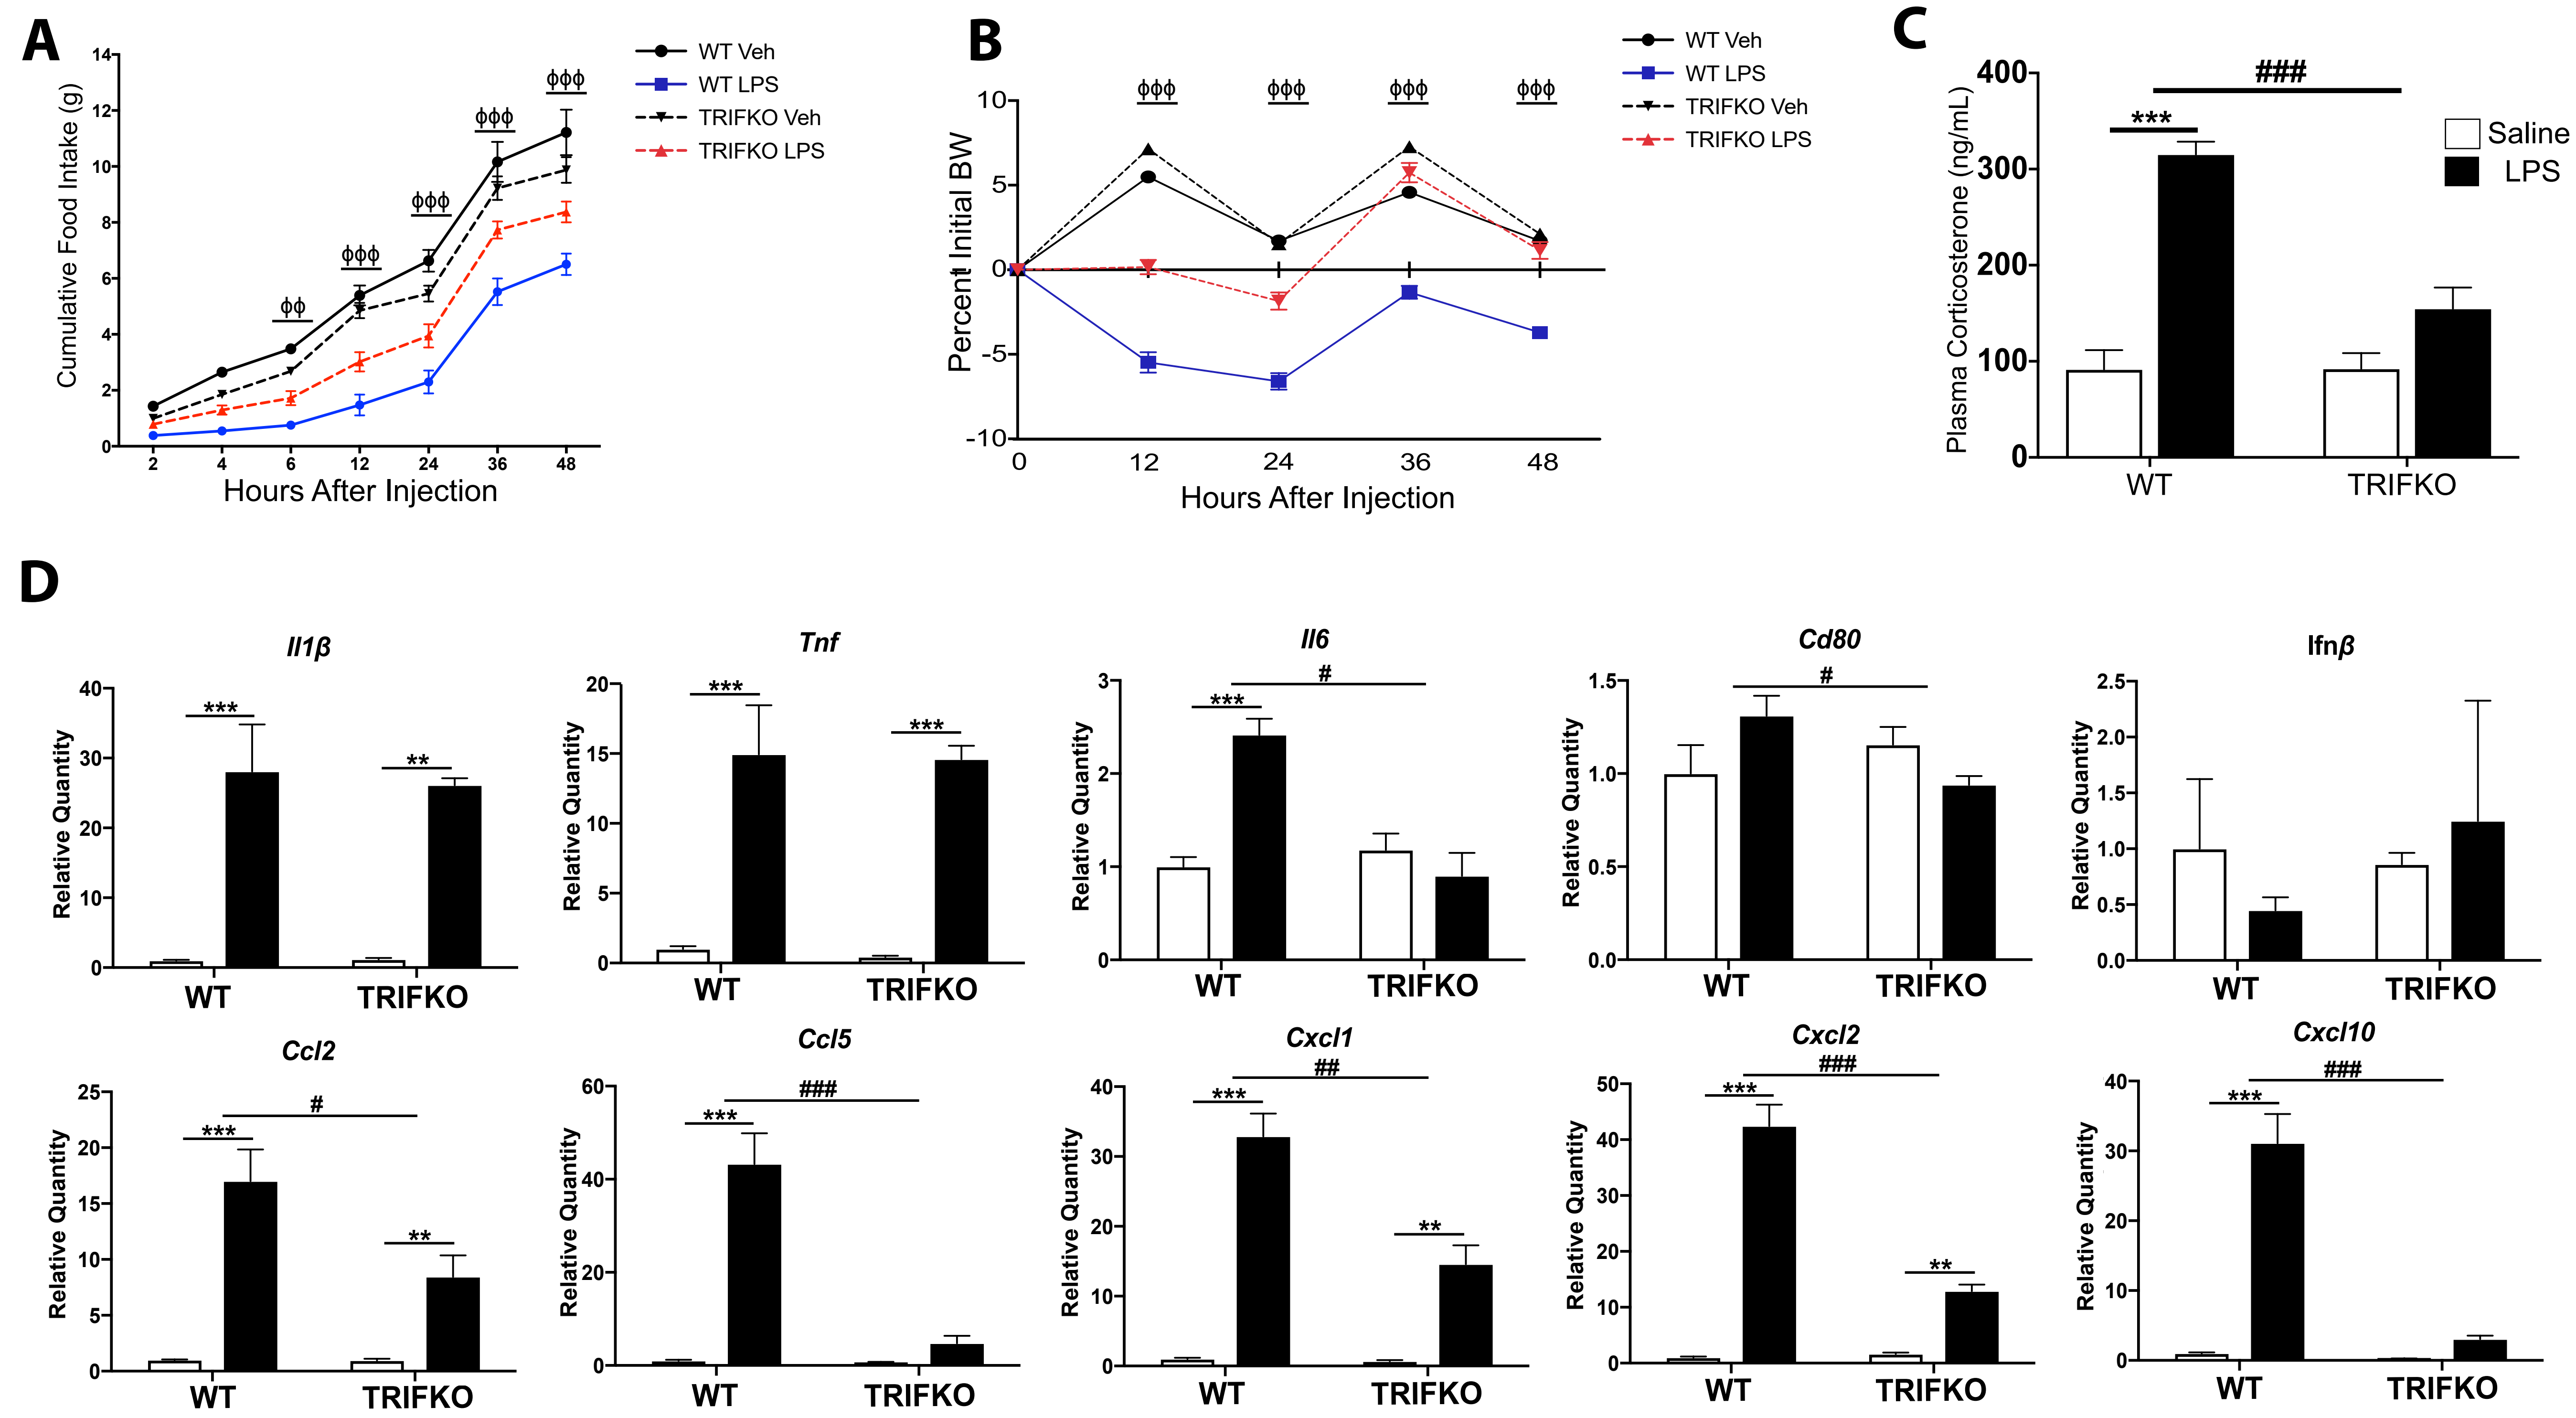

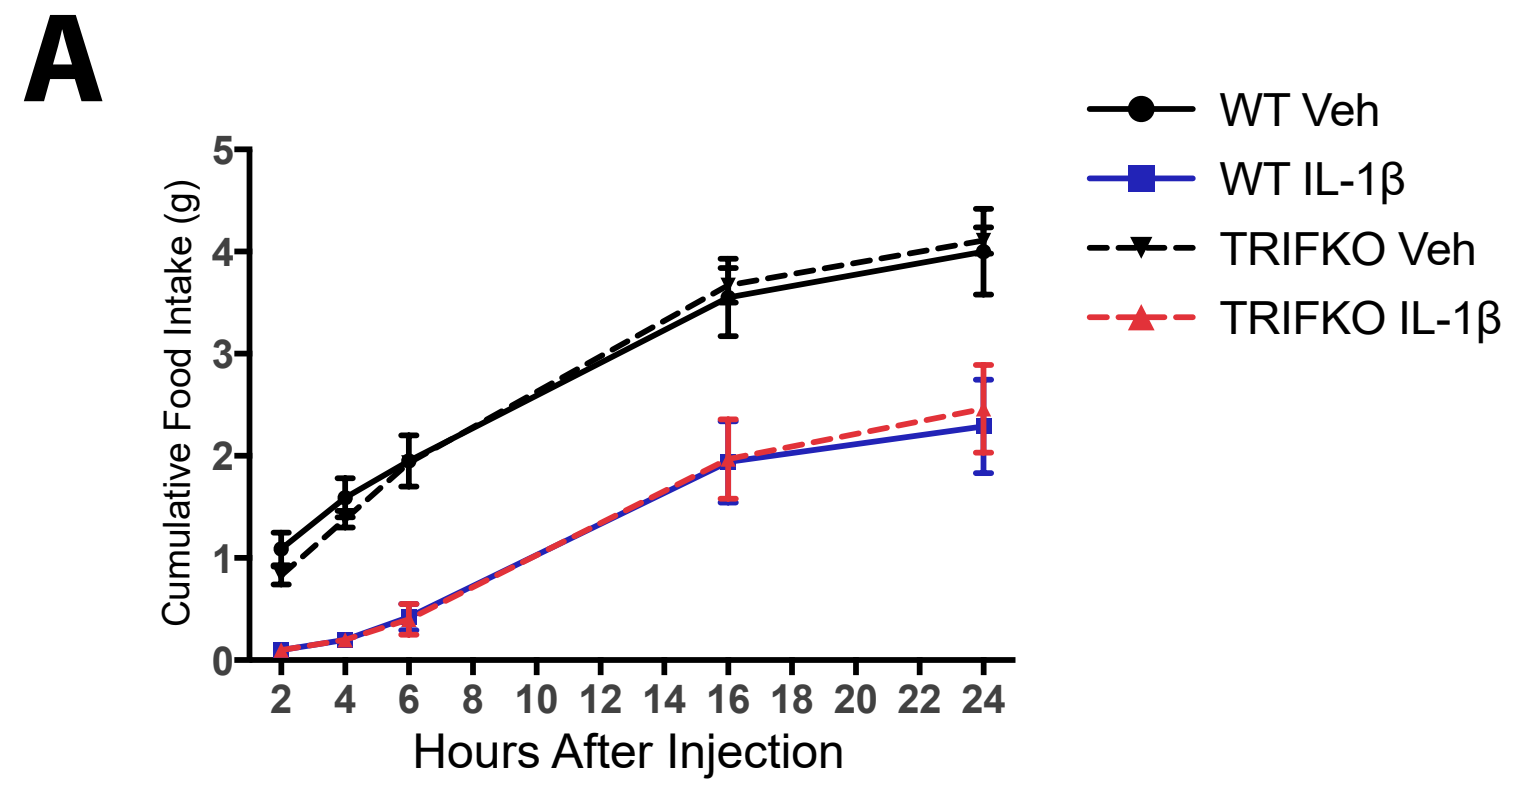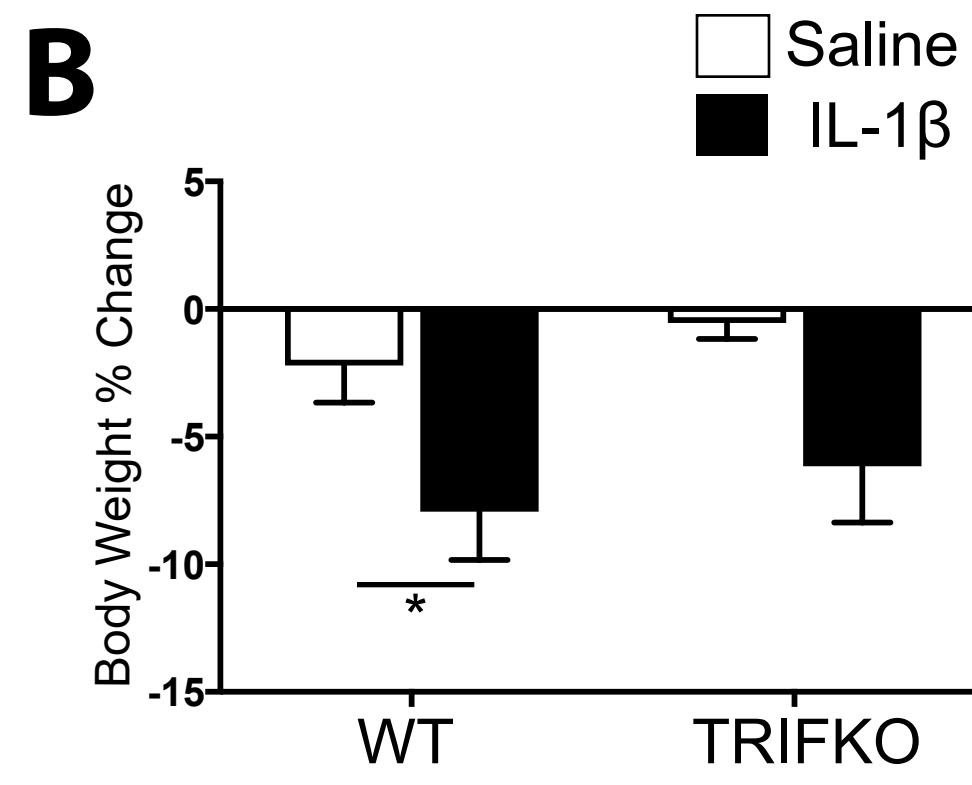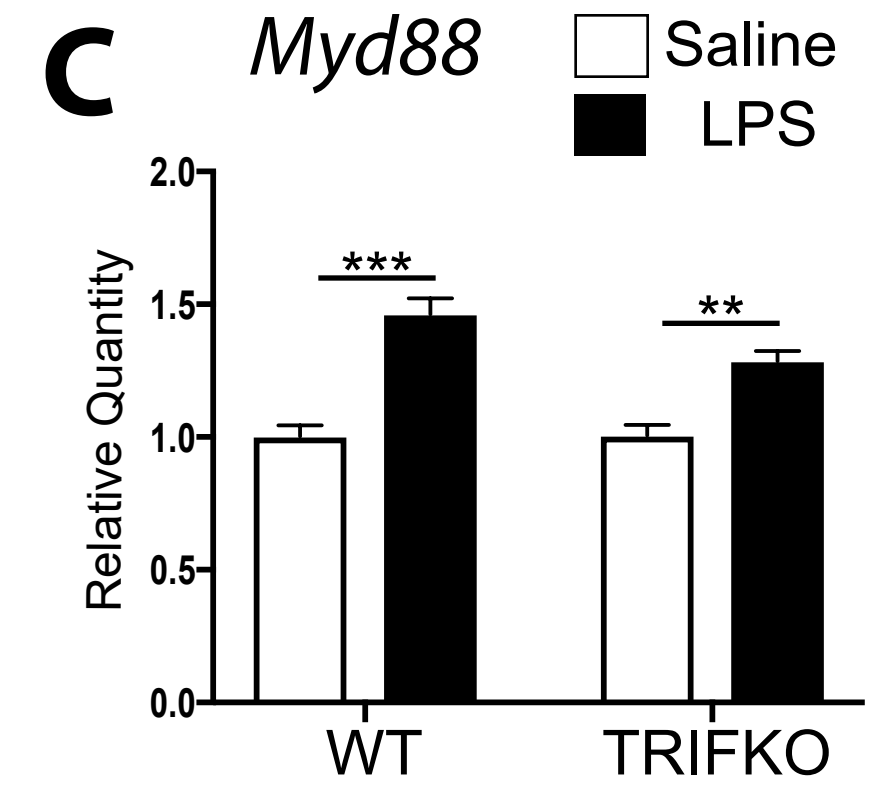

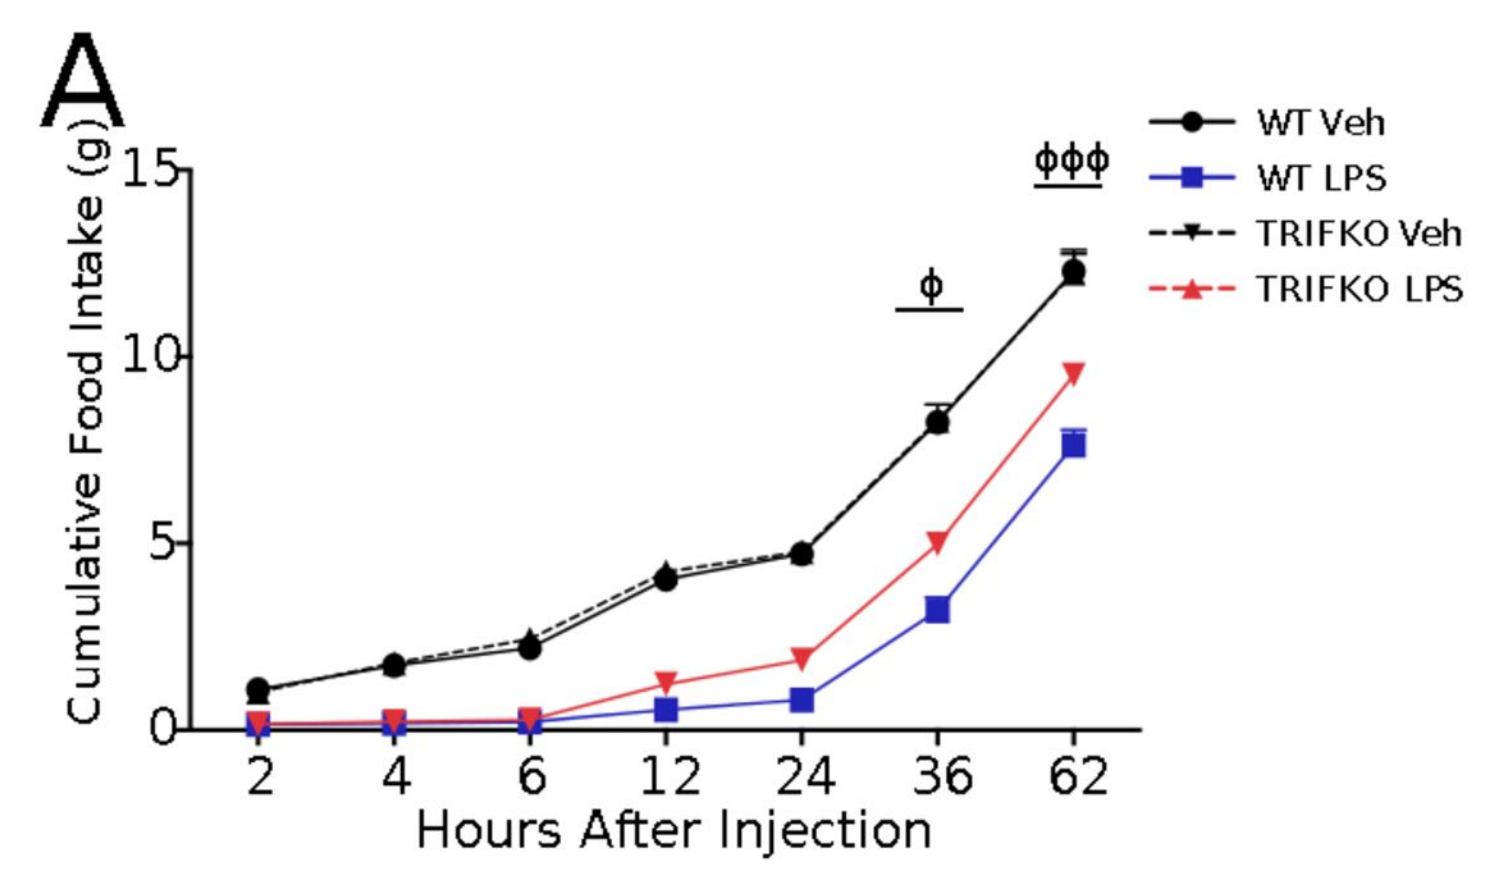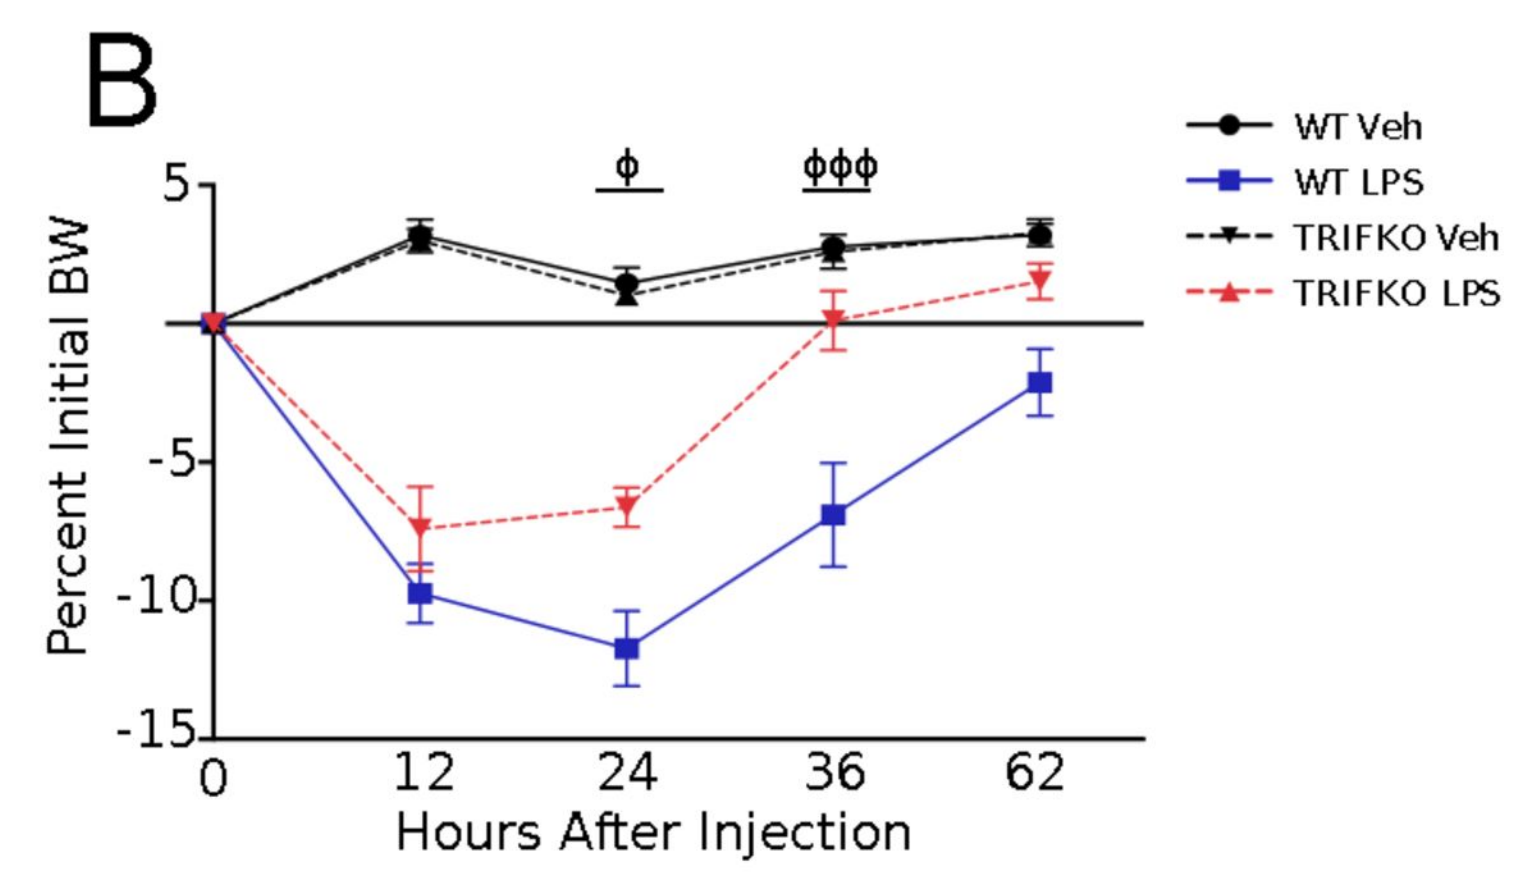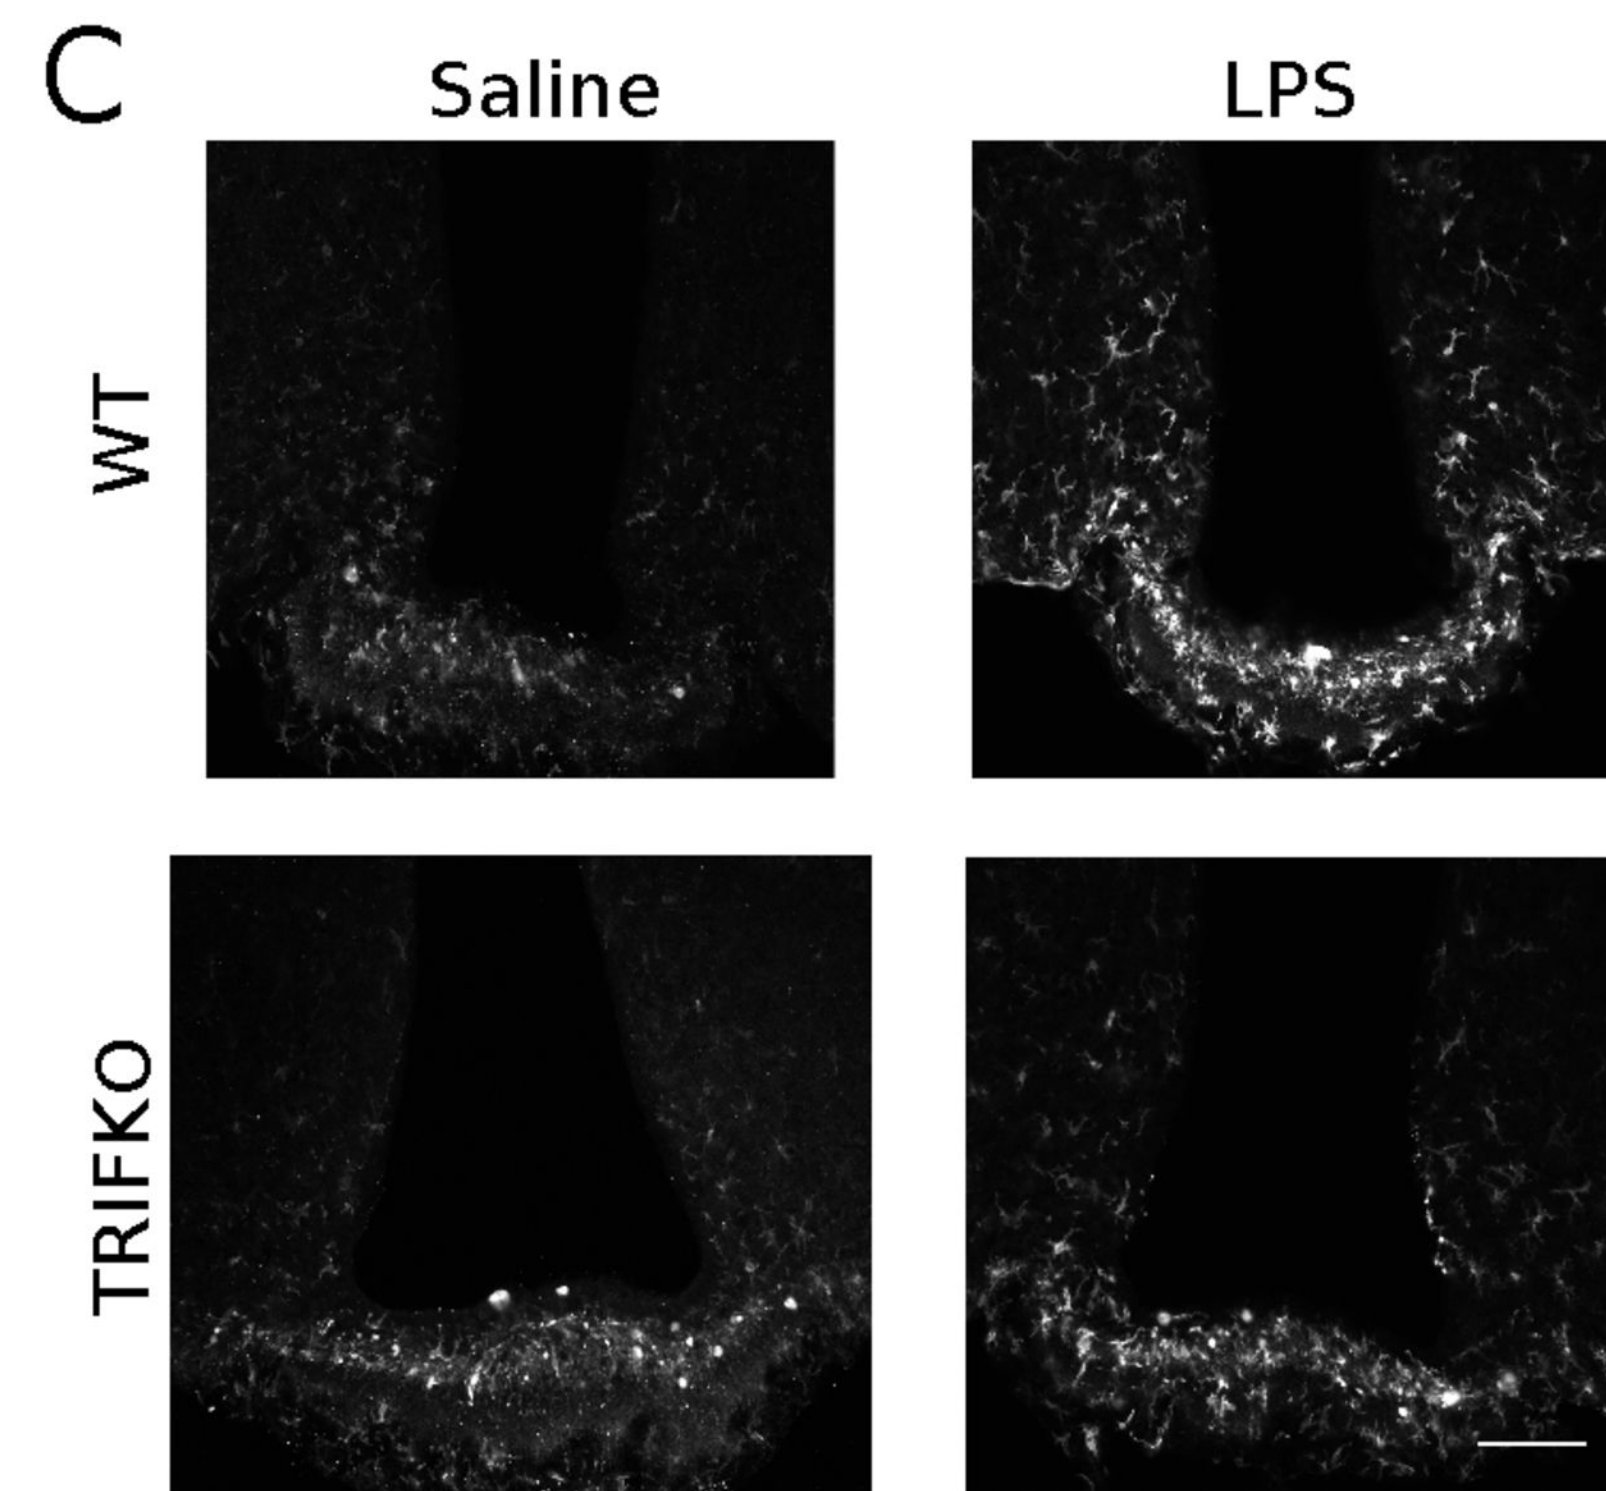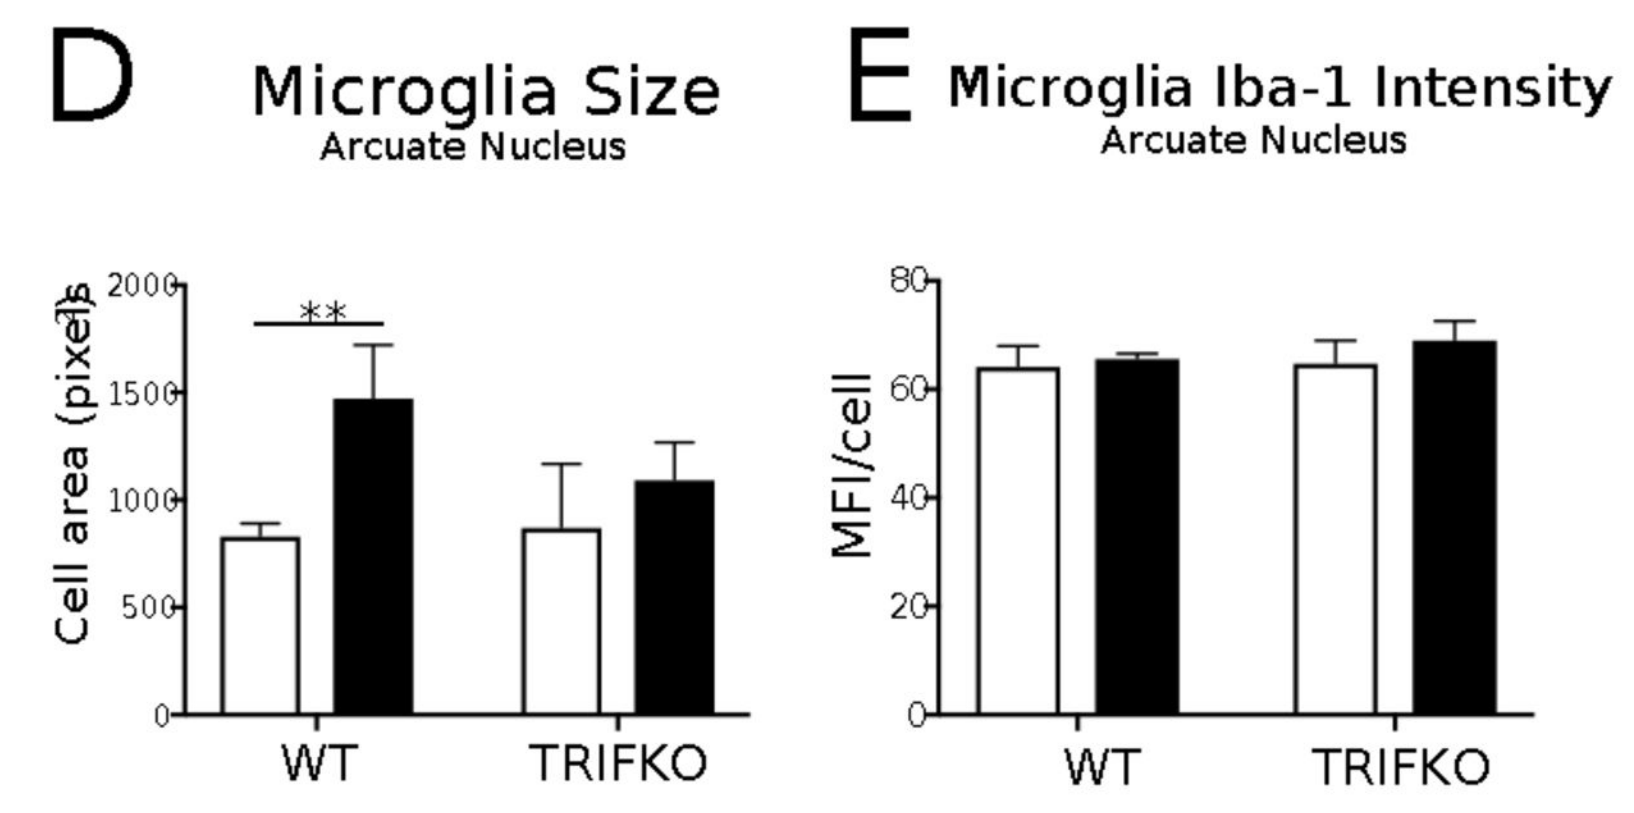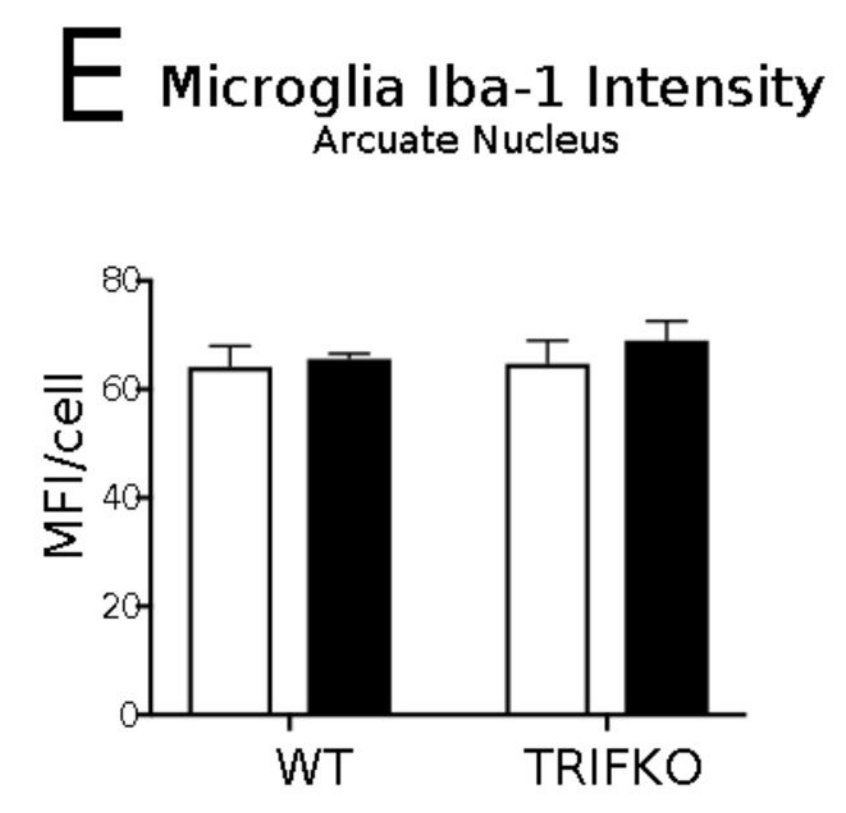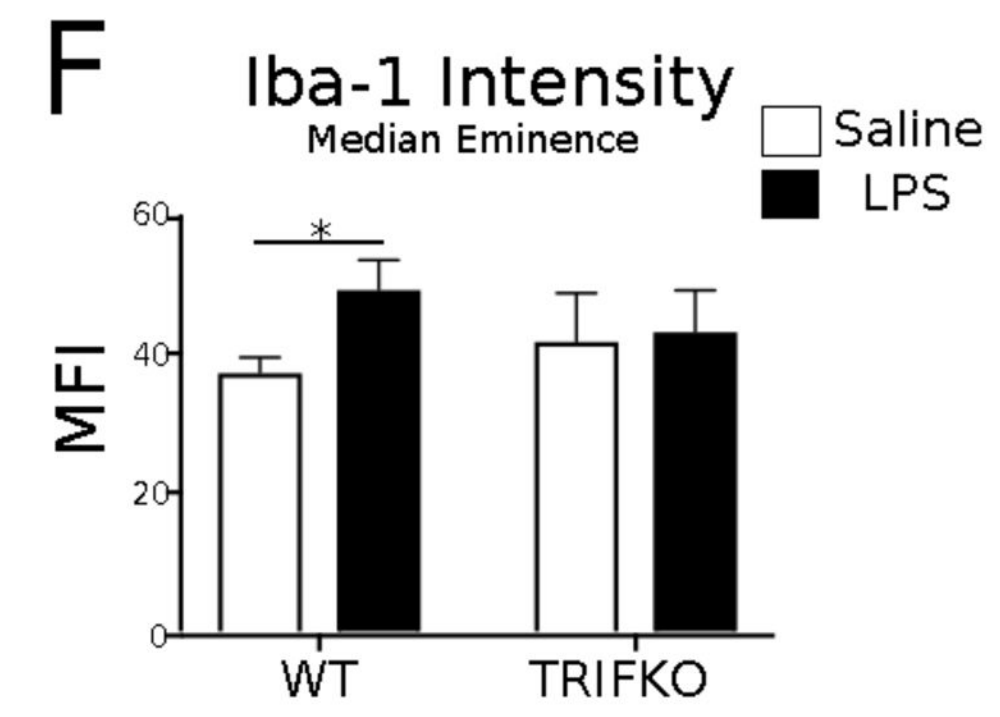

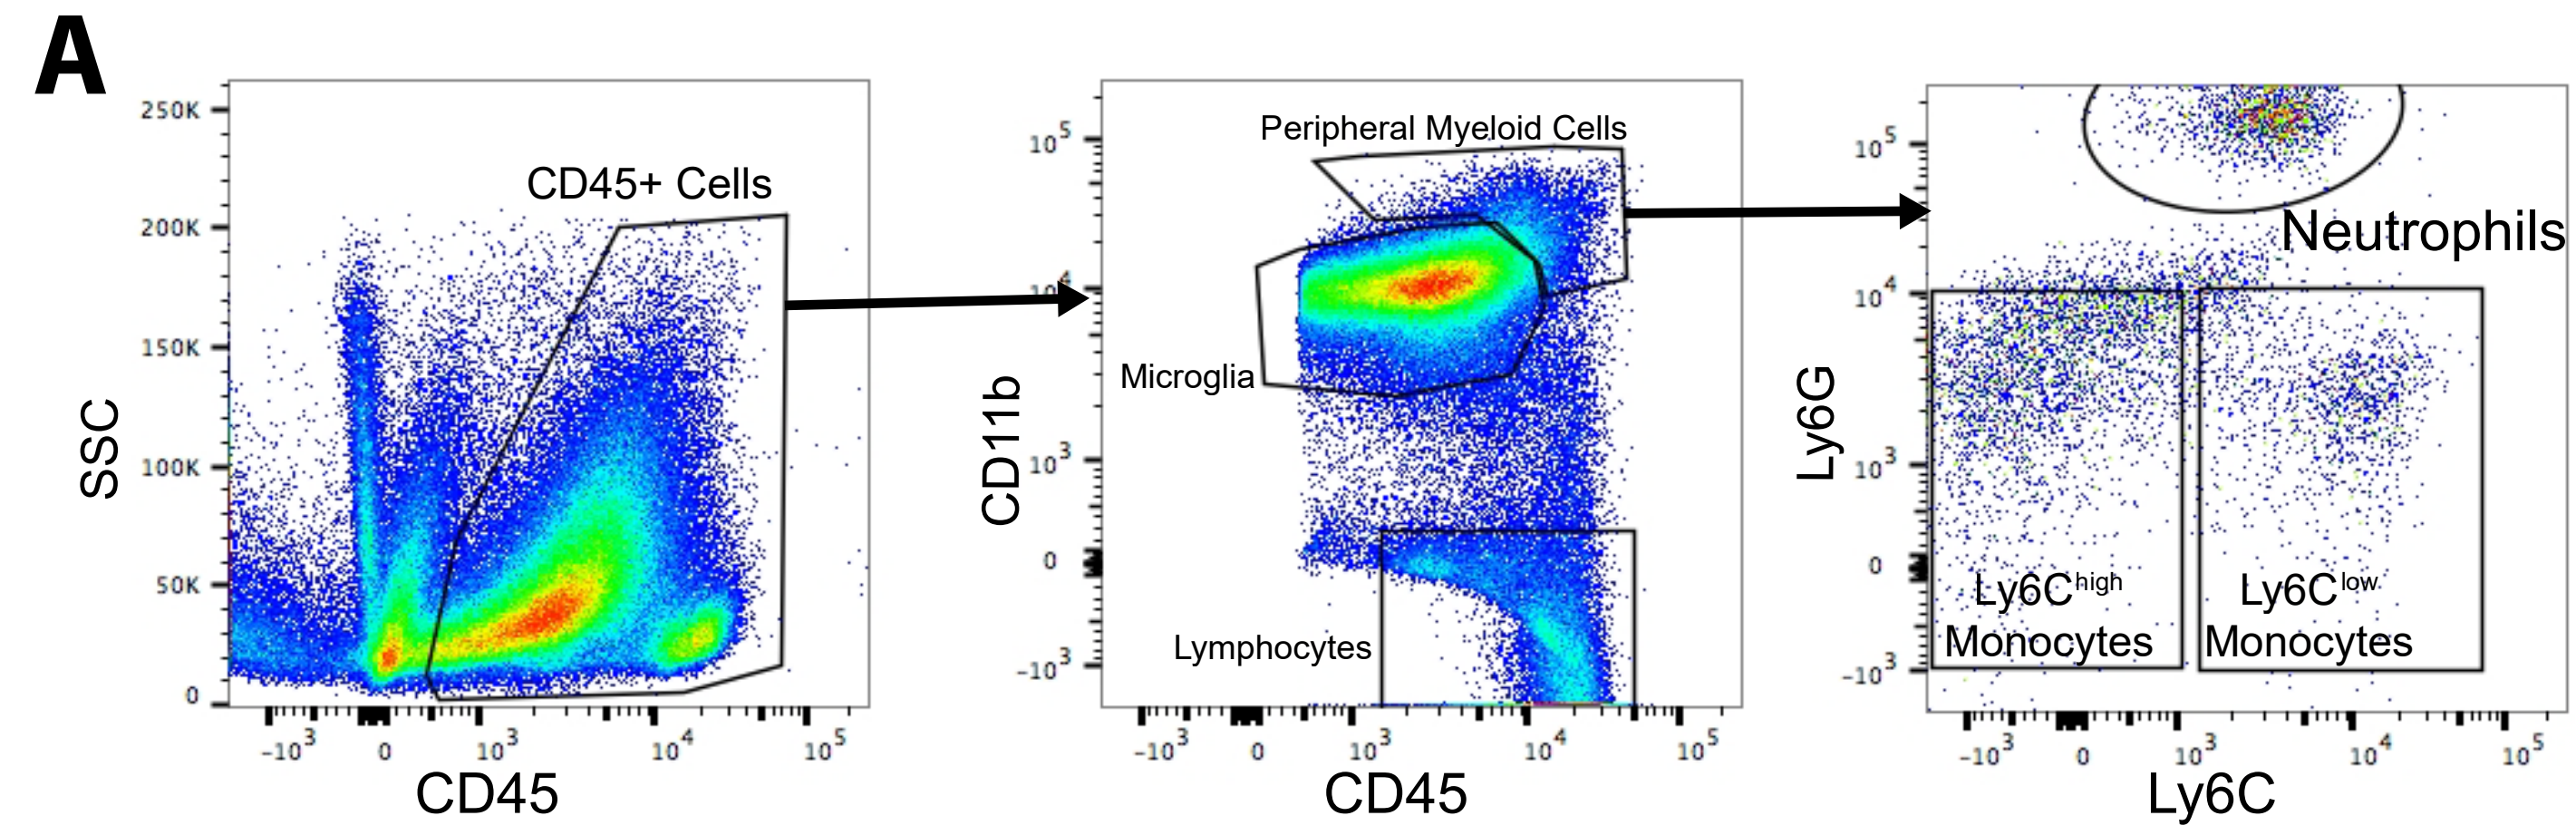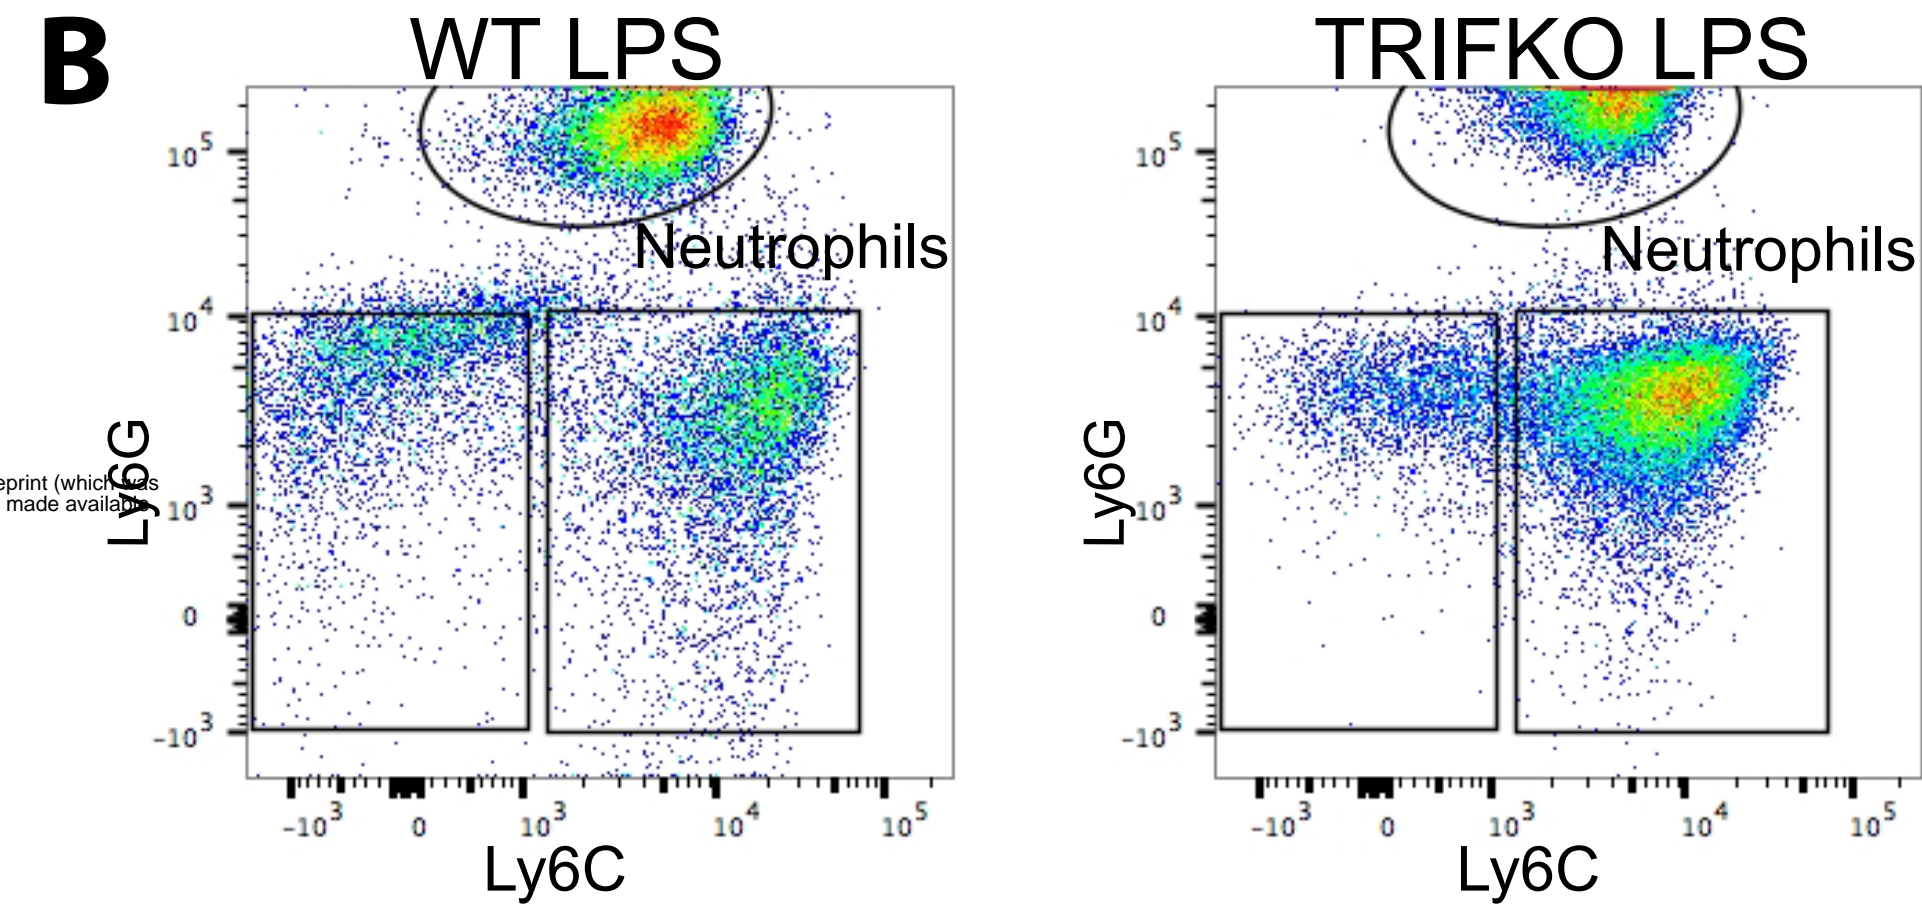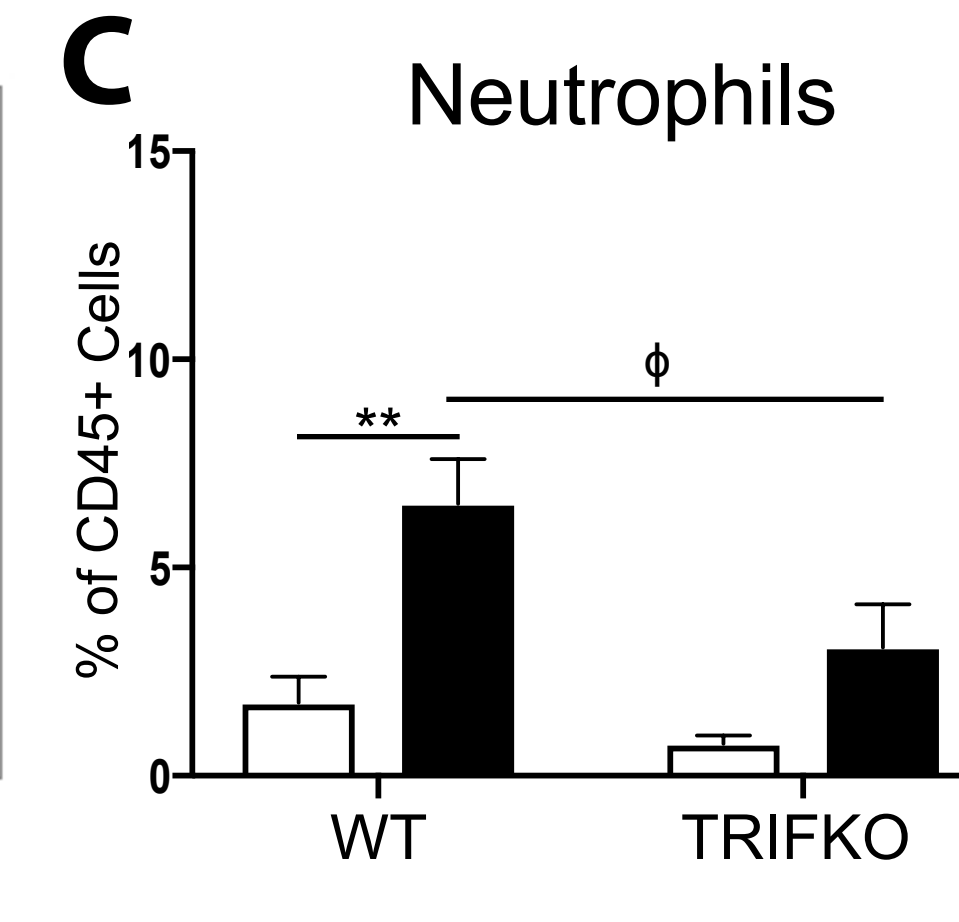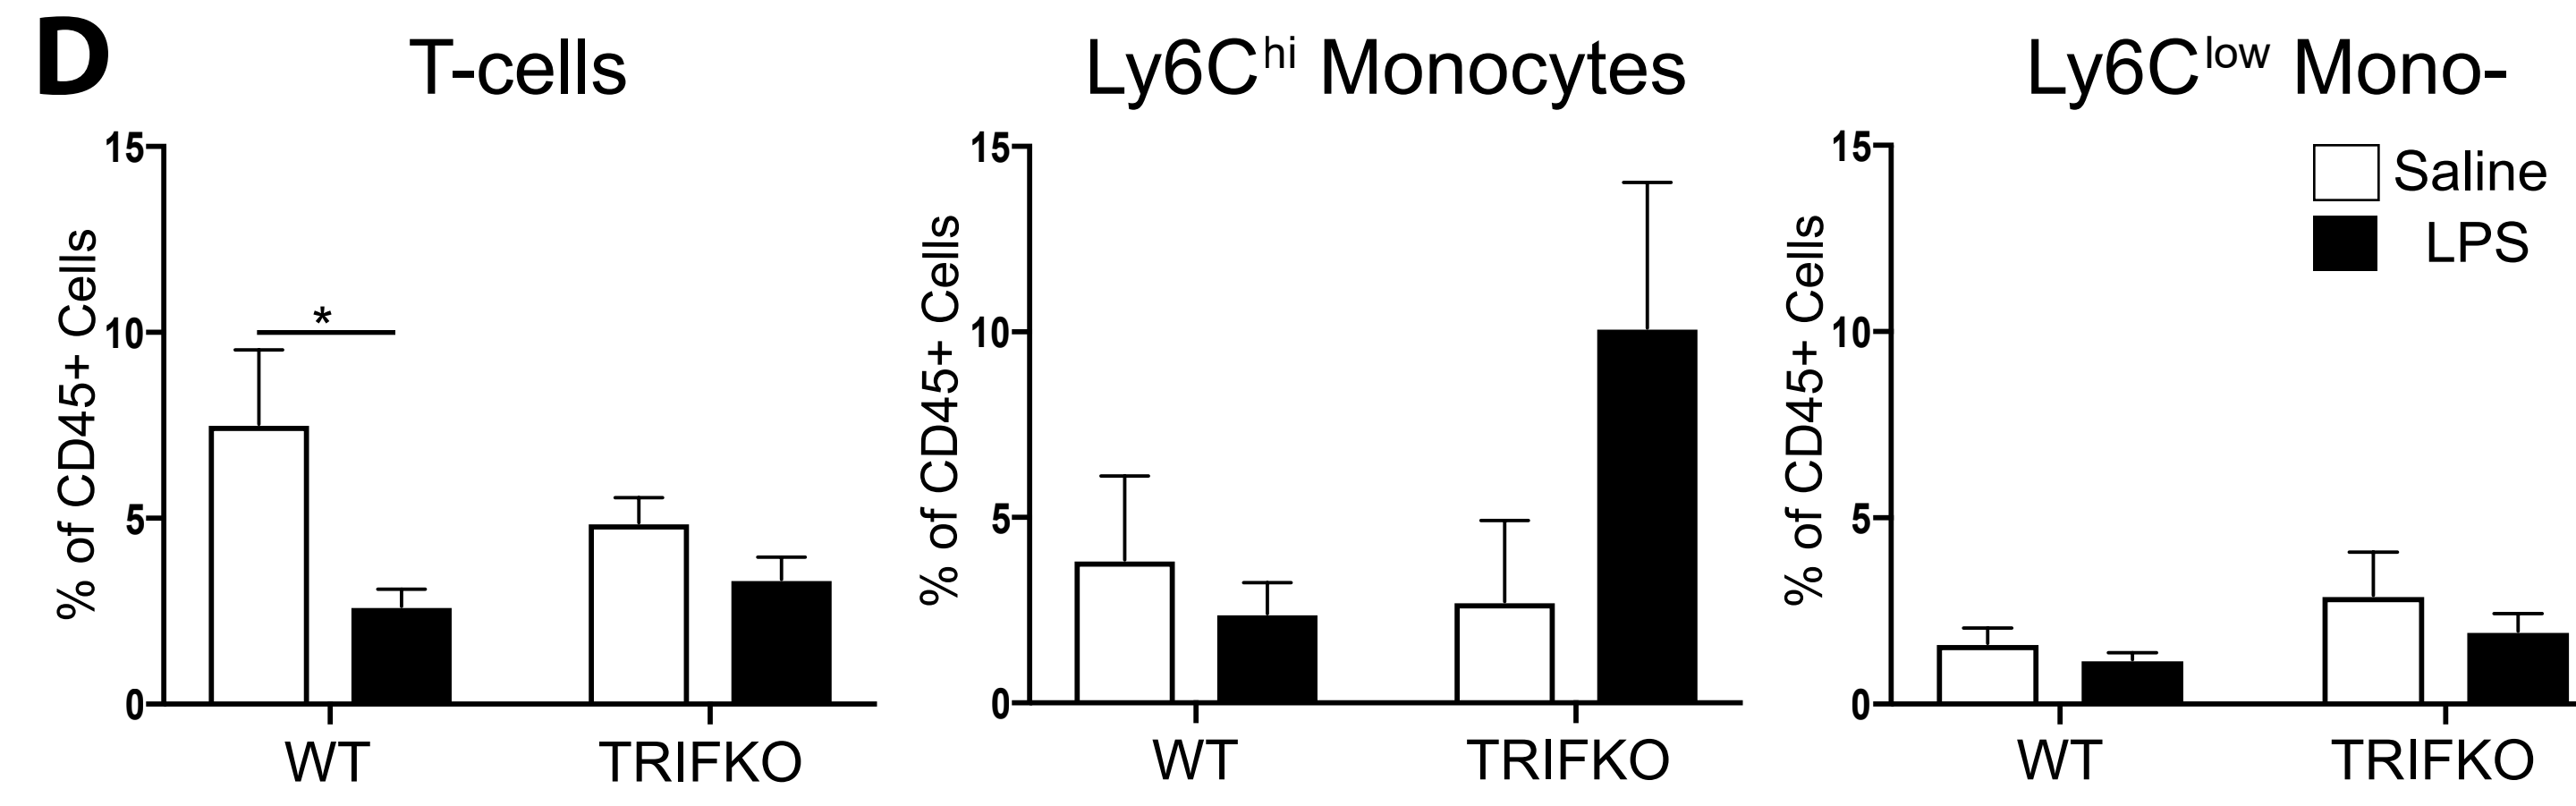

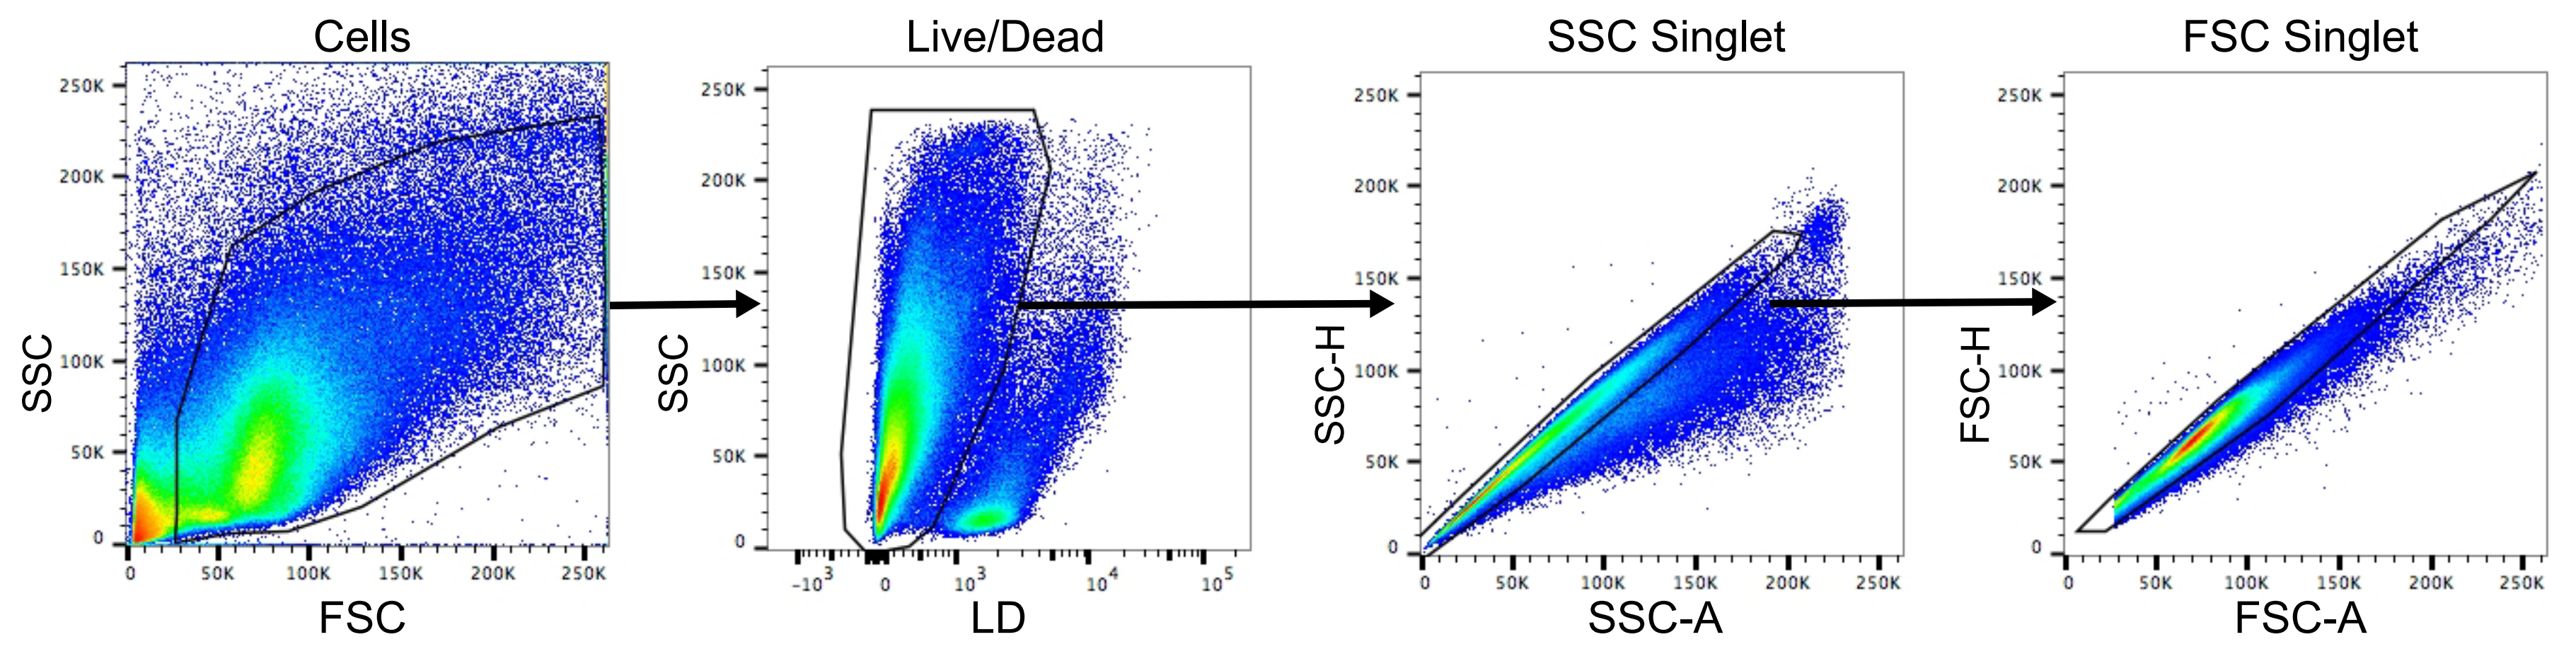

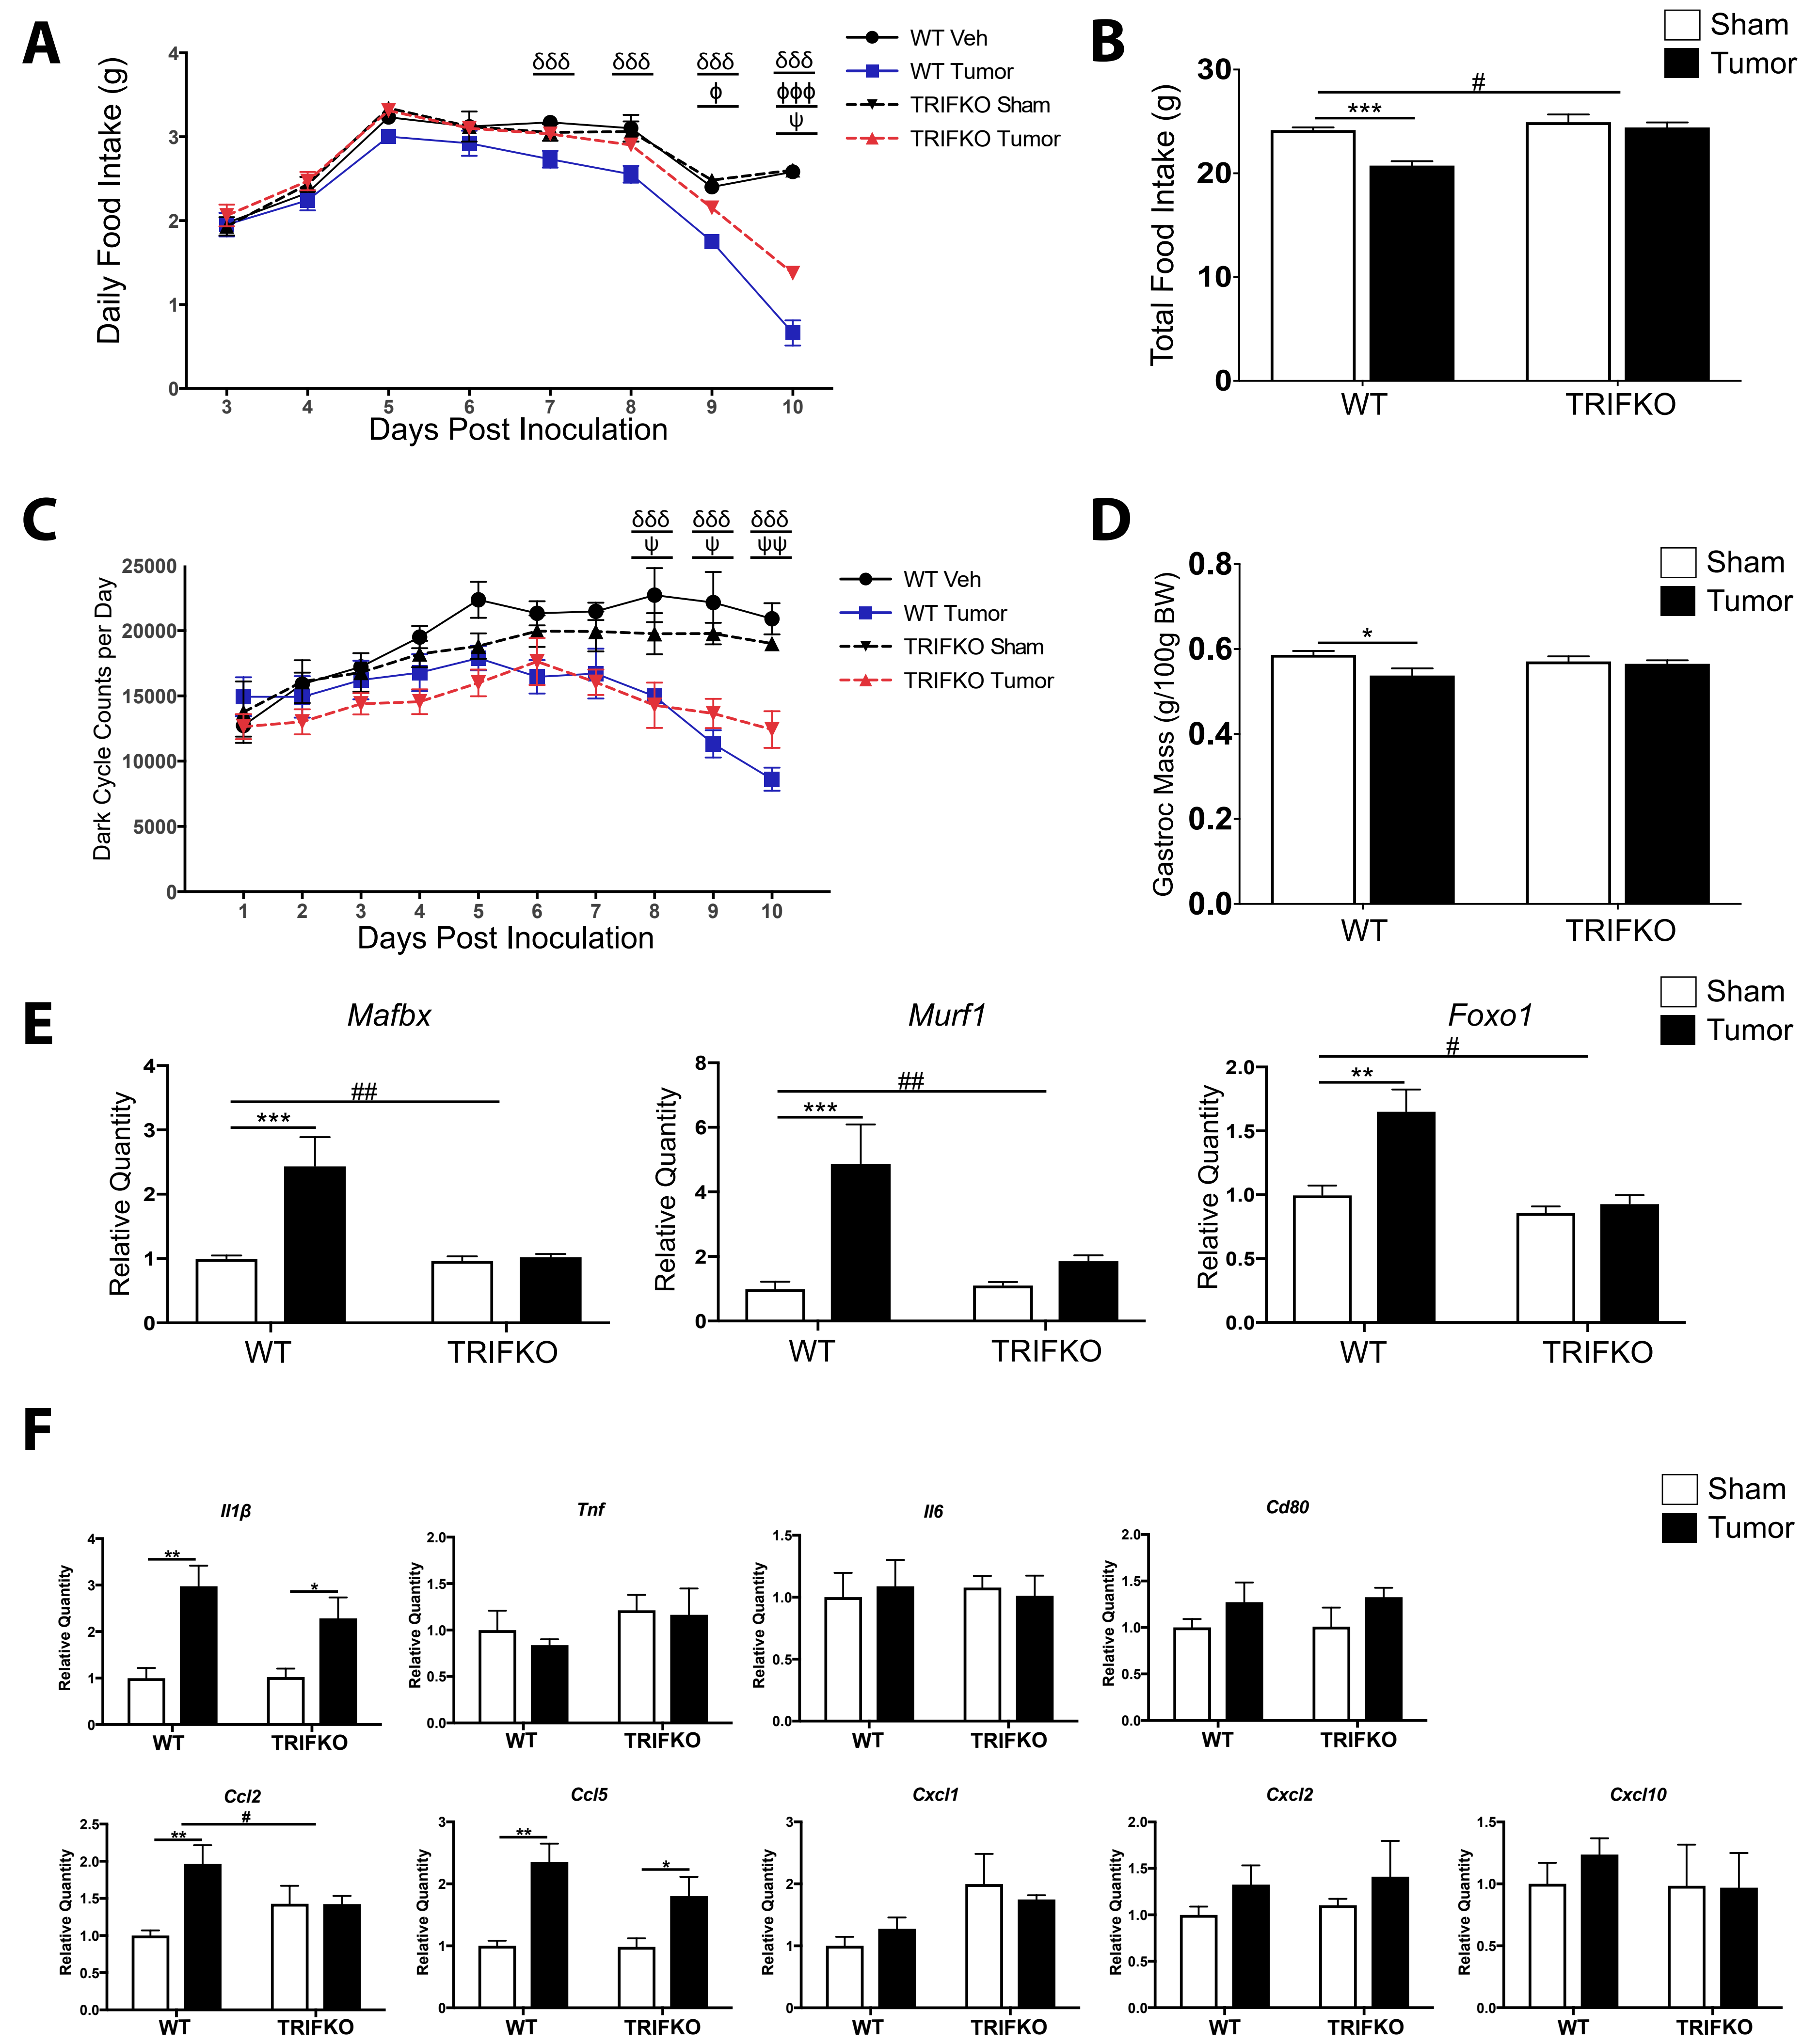

Source: https://www.biorxiv.org/content/10.1101/232280v1.full.pdf
